# Supplementary material
Source: publisher figshare collection journal article supplement (https://sage.figshare.com/ndownloader/files/14399432)
Supplement: Supplementary file 1 [file 14399432]

## Supplementary materials for

### The effect and optimal parameters of repetitive transcranial magnetic stimulation (rTMS) on motor recovery in stroke patients: A systematic review and meta-analysis of randomized controlled trials

Huifang Xiang<sup>1</sup>, MD, Jing Sun<sup>2</sup>, MD, Xiang Tang<sup>3</sup>, MD, Kebin Zeng, MD, PhD, Xiushu Wu, MD

#### This PDF file includes:

##### the appendix

**TABLE 1** *characteristics of the included studies*

**TABLE 2** *PEDro scores of included articles*

**Fig S1.** Forest plot from the meta-analysis of rTMS on motor evoked potentials showing estimates of effect size (SMD) with 95% confidence intervals. Relative weight for each trial is indicated by the size of the corresponding square.

**Fig S2.** Forest plot from the meta-analysis of rTMS on limb motor function for studies comparing different active motor threshold (AMT)rTMS protocol showing estimates of effect size (SMD) with 95% confidence intervals. Relative weight for each trial is indicated by the size of the corresponding square.

**Fig S3.** Forest plot from the meta-analysis of rTMS on limb motor function for studies comparing different resting motor threshold (RMT)rTMS protocol showing estimates of effect size (SMD) with 95% confidence intervals. Relative weight for each trial is indicated by the size of the corresponding square.

**Fig S4.** Forest plot from the meta-analysis of rTMS on limb motor function for studies comparing different stimulation pulses rTMS protocol showing estimates of effect size (SMD) with 95% confidence intervals. Relative weight for each trial is indicated by the size of the corresponding square.

**Fig S5.** Forest plot from the meta-analysis of rTMS on limb motor function for studies comparing different stimulation frequency rTMS protocol showing estimates of effect size (SMD) with 95% confidence intervals. Relative weight for each trial is indicated by the size of the corresponding square.

**Fig S6.** Forest plot from the meta-analysis of rTMS on limb motor function for studies comparing different stimulation sessions rTMS protocol showing estimates of effect size (SMD) with 95% confidence intervals. Relative weight for each trial is indicated by the size of the corresponding square.

**Fig S7.** Forest plot from the meta-analysis of rTMS on limb motor function for studies comparing different stimulation sites rTMS protocol showing estimates of effect size (SMD) with 95% confidence intervals. Relative weight for each trial is indicated by the size of the corresponding square.

**Fig S8.** Forest plot from the meta-analysis of rTMS on limb motor function showing estimates of effect size (SMD) with 95% confidence intervals after the removal of the cross-over studies.

**Fig S9.** Forest plot from the meta-analysis of rTMS on motor evoked potentials showing estimates of effect size (SMD) with 95% confidence intervals after the

removal of the cross-over study.

**Fig S10.** Forest plot from the meta-analysis of rTMS on limb motor function for studies comparing active motor threshold and resting motor threshold rTMS protocol showing estimates of effect size (SMD) with 95% confidence intervals after the removal of the cross-over studies.

**Fig S11.** Forest plot from the meta-analysis of rTMS on limb motor function for studies comparing different active motor threshold (AMT)rTMS protocol showing estimates of effect size (SMD) with 95% confidence intervals after the removal of the cross-over studies.

**Fig S12.** Forest plot from the meta-analysis of rTMS on limb motor function for studies comparing different resting motor threshold (RMT)rTMS protocol showing estimates of effect size (SMD) with 95% confidence intervals after the removal of the cross-over studies.

**Fig S13.** Forest plot from the meta-analysis of rTMS on limb motor function for studies comparing different stimulation pulses rTMS protocol showing estimates of effect size (SMD) with 95% confidence intervals after the removal of the cross-over studies.

**Fig S14.** Forest plot from the meta-analysis of rTMS on limb motor function for studies comparing different stimulation frequency rTMS protocol showing estimates of effect size (SMD) with 95% confidence intervals after the removal of the cross-over studies.

**Fig S15.** Forest plot from the meta-analysis of rTMS on limb motor function for studies comparing different stimulation sessions rTMS protocol showing estimates of effect size (SMD) with 95% confidence intervals after the removal of the cross-over studies.

**Fig S16.** Forest plot from the meta-analysis of rTMS on limb motor function for studies comparing different stimulation sites rTMS protocol showing estimates of effect size (SMD) with 95% confidence intervals after the removal of the cross-over studies.

**Fig S17.** Forest plot from the meta-analysis of rTMS on limb motor function for studies comparing early stroke(within 30 days) and chronic stroke(>30 days) showing estimates of effect size (SMD) with 95% confidence intervals after the removal of the cross-over studies.

**Fig S18.** Forest plot from the meta-analysis of rTMS on limb motor function for studies comparing pure subcortical stroke and including cortical stroke showing estimates of effect size (SMD) with 95% confidence intervals after the removal of the cross-over studies.

## **Supplementary materials**

*Appendix:*

*Literature search strategy used for the PubMed database.*

*#1 Patient*

*“Stroke” [Abstract] OR “Strokes” OR “Cerebrovascular Accident” OR  
“Cerebrovascular Accidents” OR “Cerebrovascular Stroke” OR  
“Cerebrovascular Strokes” OR “Stroke,Cerebrovascular” OR “Strokes,  
Cerebrovascular” OR “Cerebral Stroke” OR “Cerebral Strokes”*

*#2 Intervention*

*“Transcranial magnetic stimulation” [Abstract] OR “Transcranial Magnetic  
Stimulations”OR “rTMS” OR “repetitive transcranial magnetic stimulation”*

*#3 Type of study*

*#3) Randomized controlled trial[pt] OR controlled clinical trial[pt] OR  
randomized controlled trials[mh] OR clinical trial[pt] OR clinical trials[mh] OR  
( “ clinical trial ” [tw]) OR cross-over studies[mh] OR control\*[tw] OR  
prospectiv\*[tw] OR volunteer\*[tw] OR crossover studies [mh]*

*Search #1 and #2 and #3*

*Publication date: January 2005 and December 2018*

TABLE 1 characteristics of the included studies

| Study                  | N           | stroke time        | stroke age<br>(years)   | frequency<br>(hertz) | a(r)MT(%)         | Pulses     | Sessions | Outcome        | Location          |
|------------------------|-------------|--------------------|-------------------------|----------------------|-------------------|------------|----------|----------------|-------------------|
| JDu2016                | 23/23/23    | 3-30d              | 53.61±13.55             | 1/3                  | 110-120 R/80-90 R | 1200       | 5        | FMA,BI,MEP     | cortex/sub-cortex |
| Lüdemann Podubecká2016 | 10/10       | 30±7.5d            | 71.9±7.9                | 1                    | 110 R             | 900        | 1        | JHFT, rMT, MEP | cortex/sub-cortex |
| Kirton2008             | 5/5         | 6.33y              | 10.08-16.78             | 1                    | 100 R             | 1200       | 8        | MAUEF          | sub-cortex        |
| Conforto2012           | 15/14       | 5-45d              | 54.8±11.7/56.7±14.8     | 1                    | 90 R              | 1500       | 10       | JTT            | cortex/sub-cortex |
| Sasaki2013             | 9/11/9      | 6-29d              | 65±10                   | 10/1                 | 90 R              | 1000/ 1800 | 5        | TF             | cortex/sub-cortex |
| Talelli2012            | 13/12/12/12 | >1y                | 54.4±15.8/59.4±12.4     | TBS                  | 90 A              | 600        | 10       | JTT            | cortex/sub-cortex |
| Chang2012              | 9/8         | >3m                | 58.1/59.5               | 10                   | 90 R              | 1000       | 10       | JHFT           | cortex/sub-cortex |
| Hsu2013                | 6/6         | 2-4w               | 54.8±11.7/62.3±8.5      | TBS                  | 80 A              | 1200       | 10       | MEP, FMA       | cortex/sub-cortex |
| Sung2013               | 15/12/13/14 | 3-12 m             | 35-85                   | 1/TBS                | 90 R/80 A         | 600        | 20       | FMA, WMFT,FT   | cortex/sub-cortex |
| Etoh2013               | 9/9         | 5-60m              | 59.7±11                 | 1                    | 90 R              | 240        | 10       | FMA            | cortex/sub-cortex |
| Gillick2014            | 10/9        | congenital         | 8-17                    | 1                    | 90 R              | 600        | 5        | AHA            | cortex/sub-cortex |
| DiLazzaro2013          | 6/6         | >1y                | 59.5±12.4/ 57.5±12.3    | TBS                  | 80 A              | 600        | 10       | JTT            | cortex/sub-cortex |
| Ackerley2014           | 12/12       | ≥6m                | 69±8                    | TBS                  | 90 A              | 600        | 1        | PPT            | cortex/sub-cortex |
| CC Wang2014            | 16/14/14    | 3-12m              | 62.38±12.09/68.00±12.51 | 1                    | 90 R              | 600        | 10       | FMA            | cortex/sub-cortex |
| Lüdemann Podubecká2015 | 11/12/9/8   | ≥6m                | 68.3±10.8/65.7±9.9      | 1                    | 100 R             | 900        | 15       | WMFT, FT       | cortex/sub-cortex |
| CJ Zheng2015           | 55/53       | 1-4w               | 65.4±13.5/66.2±13.1     | 1                    | 90 R              | 1800       | 24       | FMA, MEP       | cortex/sub-cortex |
| Matsuura2015           | 10/10       | 4-21d              | 72.2±6.0/74.7±12.7      | 1                    | 100 R             | 1200       | 5        | FMA, MEP       | sub-cortex        |
| Blesneag AV2015        | 8/8         | 10d                | 69±5.8/69.13±7.2        | 1                    | 120 R             | 1200       | 10       | FMA,MEP        | cortex/sub-cortex |
| Avenanti A2012         | 8/8/14      | >6m                | 60.9±8.8/64±7.7/64±12.1 | 1                    | 90 R              | 1500       | 10       | JHFT, rMT      | cortex/sub-cortex |
| DKRose2014             | 9/10        | >6m                | 64.7±7.0                | 1                    | 100R              | 1200       | 16       | FMA            | /                 |
| WangCP2014             | 17/15/16    | 2-6m               | 62.2±12/-62.5±13.4      | 1/TBS                | 90R/80A           | 600        | 10       | FMA, MEP,rMT   | cortex/sub-cortex |
| Emara2010              | 20/20/20    | >1m                | 50.9±10.3-55.9±6.1      | 1/5                  | 110-120/80-90R    | 150/750    | 10       | FT, AI         | cortex/sub-cortex |
| Lomarev2007            | 7           | 1-5y               | 35-65                   | 20                   | 120 R             | 160        | 1        | PF, MEP        | cortex/sub-cortex |
| Mansur2005             | 7           | 12m                | 37-73                   | 1                    | 100 R             | 600        | 2        | PPT            | cortex/sub-cortex |
| Ameli2009              | 13/16       | 1-88w              | 56±13                   | 10                   | 80 R              | 1000       | 1        | FT             | cortex/sub-cortex |
| Dafotakis2008          | 12/12       | >1m                | 45±9                    | 1                    | 100 R             | 600        | 2        | GP             | sub-cortex        |
| Fregni2006             | 10/5        | >1y                | 56±11.5                 | 1                    | 100 R             | 1200       | 5        | PPT            | cortex/sub-cortex |
| Khedr2009              | 12/12/12    | 7-20d              | 57.9±11                 | 1/3                  | 130/100 R         | 900        | 5        | BI, MEP,KT     | cortex/sub-cortex |
| Khedr2010              | 12/13/13    | 5-15d              | 59.52±13.1              | 3/10                 | 130/100 R         | 750        | 5        | HG, MEP        | cortex/sub-cortex |
| Liepert2007            | 6/6         | <14d               | 63±11                   | 1                    | 90 R              | 1200       | 1        | NHPT           | sub-cortex        |
| Malcolm2007            | 9/10        | >1y                | 68.4 ± 8.4/65.7 ± 5.1   | 20                   | 90 A              | 2000       | 10       | WMFT           | cortex/sub-cortex |
| Pomeroy2007            | 6/7         | 1-12w              | 41-95                   | 1                    | 120 R             | 200        | 8        | ARAT           | cortex/sub-cortex |
| Takeuchi2005           | 10/10       | ≥6m                | 59.0±9.6                | 1                    | 90 R              | 1500       | 1        | PC, rMT        | sub-cortex        |
| Takeuchi2008           | 10/10       | ≥6m                | 61.2±9.7/63.4±7.4       | 1                    | 90 R              | 1500       | 1        | PC, rMT        | sub-cortex        |
| Talelli2007            | 6/6         | >1y                | 61.2±13.6               | TBS                  | 80 A              | 600        | 1        | SRT            | cortex/sub-cortex |
| Theilig2011            | 12/12       | 2w-58m             | 61±13                   | 1                    | 100 R             | 900        | 10       | WMFT,MEP       | cortex/sub-cortex |
| Nowak2008              | 15/15       | 1-4m               | 46±8                    | 1                    | 100 R             | 600        | 1        | Wrist Velocity | sub-cortex        |
| Hosomi2016             | 18/21       | 8w                 | 62.9±13.8               | 5                    | 90 R              | 500        | 10       | FMA            | cortex/sub-cortex |
| Sasaki2017             | 11/10       | 11.2±7.3d          | 61.4±13.7               | 10                   | 90 R              | 1000       | 10       | BRS            | sub-cortex        |
| Guan2017               | 21/21       | 4.6±3.7d           | 58.5±11.1               | 5                    | 120 R             | 1000       | 10       | BI,FMA         | sub-cortex        |
| Huang2017              | 18/20       | 10-90d             | 62.2±10.4/61.2±9.4      | 1                    | 120 A             | 900        | 15       | BI,FMA         | cortex/sub-cortex |
| Zhao2017               | 8/9         | 1.1±0.77/1.6±0.81m | 52.7±12.3/50.5±13       | 1                    | 70                | 1200       | 14       | FMA            | /                 |
| Rastgo2016             | 17/17       | >6m                | 54.6±11.7/49.7±11       | 1                    | 90                | 1000       | 5        | FMA            | cortex/sub-cortex |

**JTT**=Jebesen-Taylor-Test, **JHFT**=Jebesen hand function test, **MEP**=motor evoked potential,**WMFT**=Wolf Motor Function Test, **BI**=Barthel Index, **KT**=keyboard tapping, **aMT**=active motor threshold, **rMT**=rest motor threshold, **FT**=finger-tapping, **AI**=Activity Index, **PF**=pinch force **GP**=grip force, **HG**=hand grip, **PPT**=Purdue Pegboard Test,**TF**=tapping frequency, **NHPT**=Nine Hole Peg Test, **ARAT**=Action Research Arm Test, **PC**=pinch acceleration, **SRT**=simple reaction time, **FMA**=Fugl-Meyer Assessment,**AHA**=Assisting Hand Assessment, **MAUEF**=Melbourne assessment of upper extremity function,**TBS**=theta burst stimulation,y=year,m=month,w=week,d=day



**TABLE 2 PEDro scores of included articles**

| Study                      | 1 <sup>a</sup> | 2 | 3 | 4 | 5 | 6 | 7 | 8 | 9 | 10 | 11 | total score(10) | Quality  |
|----------------------------|----------------|---|---|---|---|---|---|---|---|----|----|-----------------|----------|
| J.Du2016                   | Y              | 1 | 1 | 1 | 1 | 0 | 1 | 1 | 1 | 1  | 1  | 9               | High     |
| Lüdemann-<br>Podubecká2016 | Y              | 1 | 1 | 1 | 1 | 1 | 1 | 1 | 1 | 1  | 1  | 10              | High     |
| Lüdemann-<br>Podubecká2015 | Y              | 1 | 1 | 1 | 1 | 1 | 1 | 1 | 1 | 1  | 1  | 10              | High     |
| WangCP2014                 | Y              | 1 | 1 | 1 | 1 | 1 | 1 | 1 | 1 | 1  | 1  | 10              | High     |
| CC Wang2014                | Y              | 1 | 1 | 1 | 1 | 0 | 1 | 1 | 1 | 1  | 1  | 9               | High     |
| DKRose2014                 | Y              | 1 | 1 | 1 | 0 | 1 | 1 | 1 | 1 | 1  | 1  | 9               | High     |
| Sung2013                   | Y              | 1 | 1 | 1 | 1 | 1 | 1 | 1 | 1 | 1  | 1  | 10              | High     |
| Conforto2012               | Y              | 1 | 1 | 1 | 1 | 1 | 1 | 1 | 1 | 1  | 1  | 10              | High     |
| Emara2010                  | Y              | 1 | 1 | 1 | 1 | 0 | 1 | 1 | 1 | 1  | 1  | 9               | High     |
| Khedr2010                  | Y              | 1 | 1 | 1 | 1 | 0 | 1 | 1 | 1 | 1  | 1  | 9               | High     |
| Khedr2009                  | Y              | 1 | 1 | 1 | 1 | 0 | 1 | 1 | 1 | 1  | 1  | 9               | High     |
| Pomeroy2007                | Y              | 1 | 1 | 1 | 1 | 0 | 1 | 1 | 1 | 1  | 1  | 9               | High     |
| Fregni2006                 | Y              | 1 | 1 | 1 | 0 | 0 | 0 | 1 | 1 | 1  | 1  | 7               | High     |
| Guan2017                   | Y              | 1 | 1 | 1 | 1 | 1 | 1 | 1 | 1 | 1  | 1  | 10              | High     |
| Sasaki2013                 | Y              | 1 | 0 | 1 | 1 | 0 | 1 | 1 | 1 | 1  | 1  | 8               | Moderate |
| Talelli2012                | Y              | 0 | 0 | 1 | 1 | 1 | 0 | 1 | 1 | 1  | 1  | 7               | Moderate |
| Chang2012                  | Y              | 1 | 0 | 1 | 1 | 0 | 0 | 1 | 1 | 1  | 1  | 7               | Moderate |
| Hsu2013                    | Y              | 1 | 0 | 1 | 1 | 0 | 1 | 1 | 1 | 1  | 1  | 8               | Moderate |
| Etoh2013                   | Y              | 1 | 0 | 1 | 1 | 1 | 1 | 1 | 1 | 1  | 1  | 9               | Moderate |
| Gillick2014                | Y              | 1 | 0 | 1 | 1 | 0 | 1 | 1 | 1 | 1  | 1  | 8               | Moderate |
| DiLazzaro2013              | Y              | 1 | 0 | 1 | 1 | 0 | 1 | 1 | 1 | 1  | 1  | 8               | Moderate |
| Ackerley2014               | Y              | 1 | 0 | 1 | 1 | 0 | 1 | 1 | 1 | 1  | 1  | 8               | Moderate |
| CJ Zheng2015               | Y              | 1 | 0 | 1 | 1 | 0 | 1 | 1 | 1 | 1  | 1  | 8               | Moderate |
| Matsuura2015               | Y              | 1 | 0 | 1 | 1 | 0 | 1 | 1 | 1 | 1  | 1  | 8               | Moderate |
| Blesneag 2015              | Y              | 1 | 0 | 1 | 0 | 0 | 1 | 1 | 1 | 1  | 1  | 7               | Moderate |
| Avenanti 2012              | Y              | 1 | 0 | 1 | 1 | 1 | 1 | 1 | 1 | 1  | 1  | 9               | Moderate |
| Lomarev2007                | Y              | 1 | 0 | 0 | 0 | 0 | 0 | 0 | 1 | 1  | 1  | 4               | Moderate |
| Mansur2005                 | Y              | 1 | 0 | 1 | 0 | 0 | 1 | 1 | 1 | 1  | 1  | 7               | Moderate |
| Liepert2007                | Y              | 0 | 0 | 1 | 1 | 0 | 1 | 1 | 1 | 1  | 1  | 7               | Moderate |
| Malcolm2007                | Y              | 1 | 0 | 1 | 1 | 1 | 1 | 1 | 1 | 1  | 1  | 9               | Moderate |
| Takeuchi2005               | Y              | 1 | 0 | 1 | 1 | 0 | 1 | 1 | 1 | 1  | 1  | 8               | Moderate |
| Takeuchi2008               | Y              | 1 | 0 | 1 | 1 | 0 | 1 | 1 | 1 | 1  | 1  | 8               | Moderate |
| Talelli2007                | Y              | 1 | 0 | 1 | 1 | 0 | 0 | 1 | 1 | 1  | 1  | 7               | Moderate |
| Theilig2011                | Y              | 1 | 0 | 1 | 1 | 0 | 1 | 1 | 1 | 1  | 1  | 8               | Moderate |
| Nowak2008                  | Y              | 1 | 0 | 1 | 0 | 0 | 0 | 1 | 1 | 1  | 1  | 6               | Moderate |
| Ameli2009                  | Y              | 1 | 0 | 1 | 1 | 0 | 0 | 1 | 1 | 1  | 1  | 7               | Moderate |
| Dafotakis2008              | Y              | 1 | 0 | 1 | 1 | 0 | 0 | 1 | 1 | 1  | 1  | 7               | Moderate |
| Kirton2008                 | Y              | 1 | 0 | 1 | 1 | 1 | 1 | 1 | 1 | 1  | 1  | 9               | Moderate |
| Hosomi2016                 | Y              | 1 | 0 | 1 | 1 | 1 | 1 | 1 | 1 | 1  | 1  | 9               | Moderate |
| Sasaki2017                 | Y              | 1 | 0 | 1 | 1 | 1 | 1 | 1 | 1 | 1  | 1  | 9               | Moderate |
| Huang2017                  | Y              | 1 | 0 | 1 | 1 | 1 | 1 | 1 | 1 | 1  | 1  | 9               | Moderate |
| Zhao2017                   | Y              | 1 | 0 | 1 | 1 | 1 | 1 | 1 | 1 | 1  | 1  | 9               | Moderate |
| Rastgoo2016                | Y              | 1 | 0 | 1 | 1 | 1 | 1 | 1 | 1 | 1  | 1  | 9               | Moderate |

<sup>a</sup>Not included in total score.

Y,yes;1,eligibility criteria;2,random allocation;3,concealed allocation; 4,similar groups at baseline; 5,blinding subjects; 6,blinding therapists; 7,blinding assessors; 8,outcome obtained in more than 85% of the subjects;9,intention-to-treat analysis;10,between-group statistical comparison;11, point estimates and measures of variability.

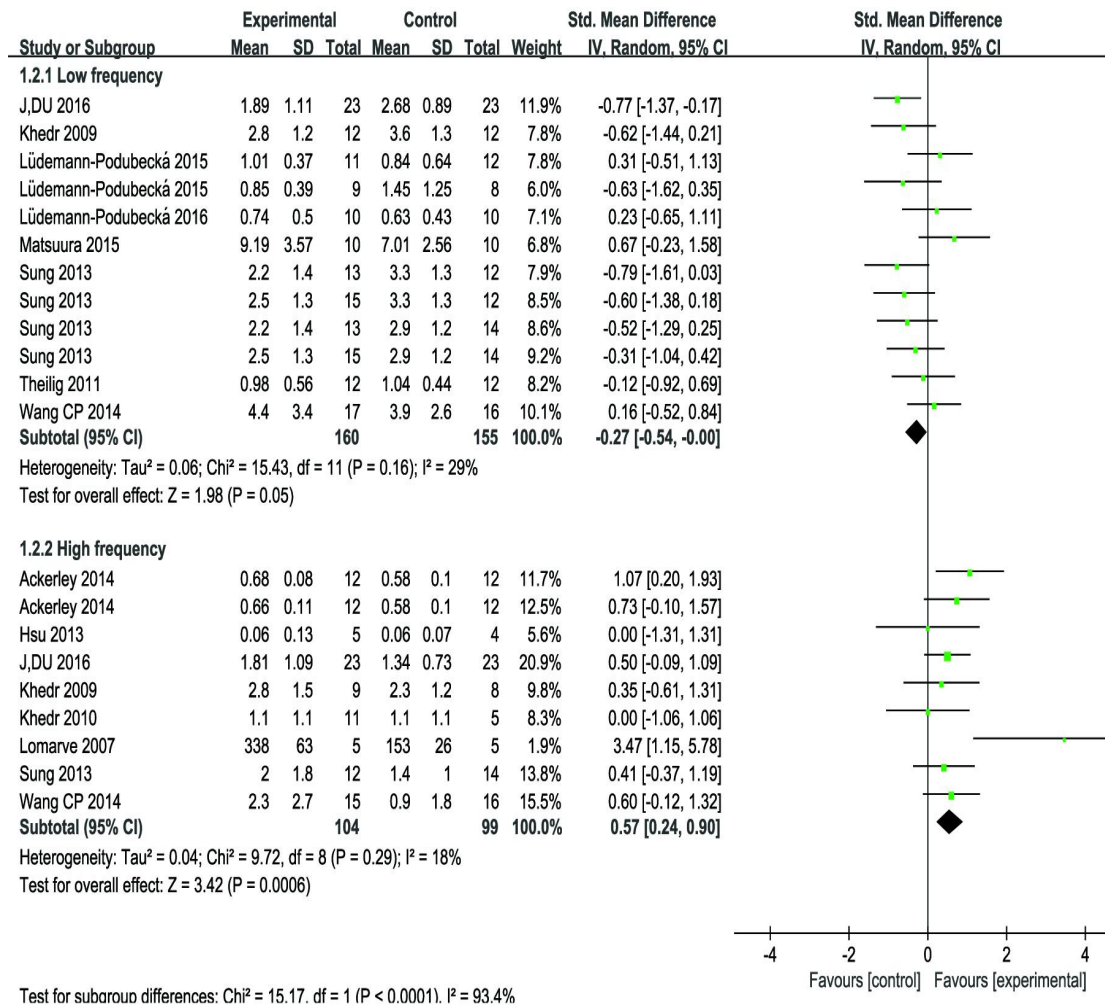

**Fig S1.** Forest plot from the meta-analysis of rTMS on motor evoked potentials showing estimates of effect size (SMD) with 95% confidence intervals. Relative weight for each trial is indicated by the size of the corresponding square.

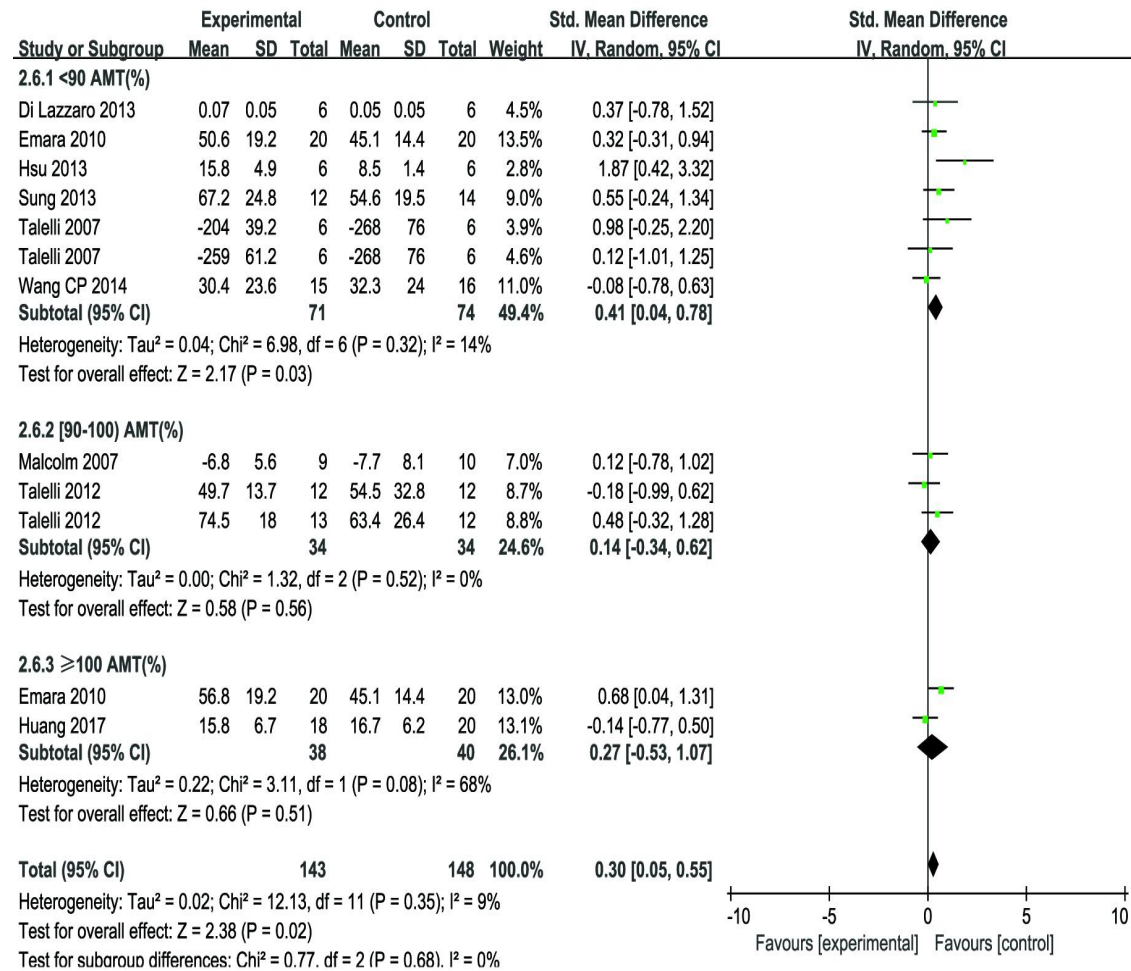

**Fig S2.** Forest plot from the meta-analysis of rTMS on limb motor function for studies comparing different active motor threshold (AMT)rTMS protocol showing estimates of effect size (SMD) with 95% confidence intervals. Relative weight for each trial is indicated by the size of the corresponding square.

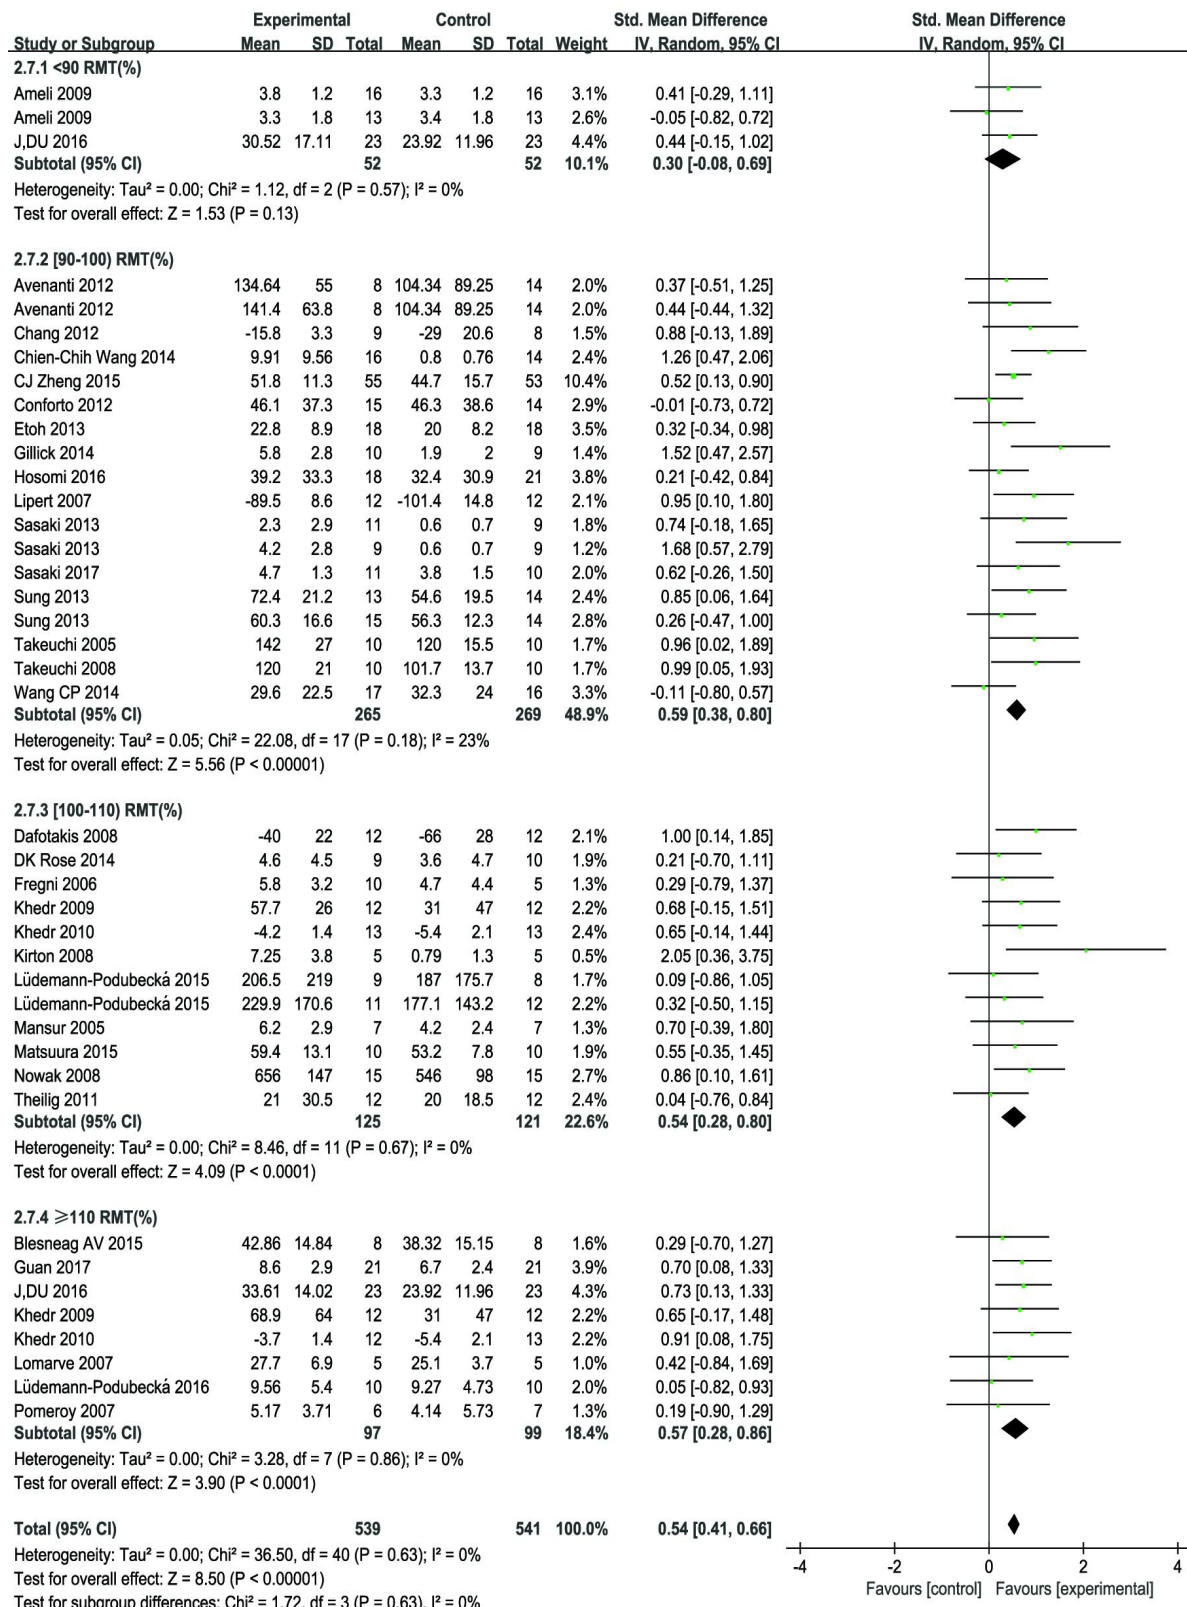

**Fig S3.** Forest plot from the meta-analysis of rTMS on limb motor function for studies comparing different resting motor threshold (RMT)rTMS protocol showing estimates of effect size (SMD) with 95% confidence intervals. Relative weight for each trial is indicated by the size of the corresponding square.

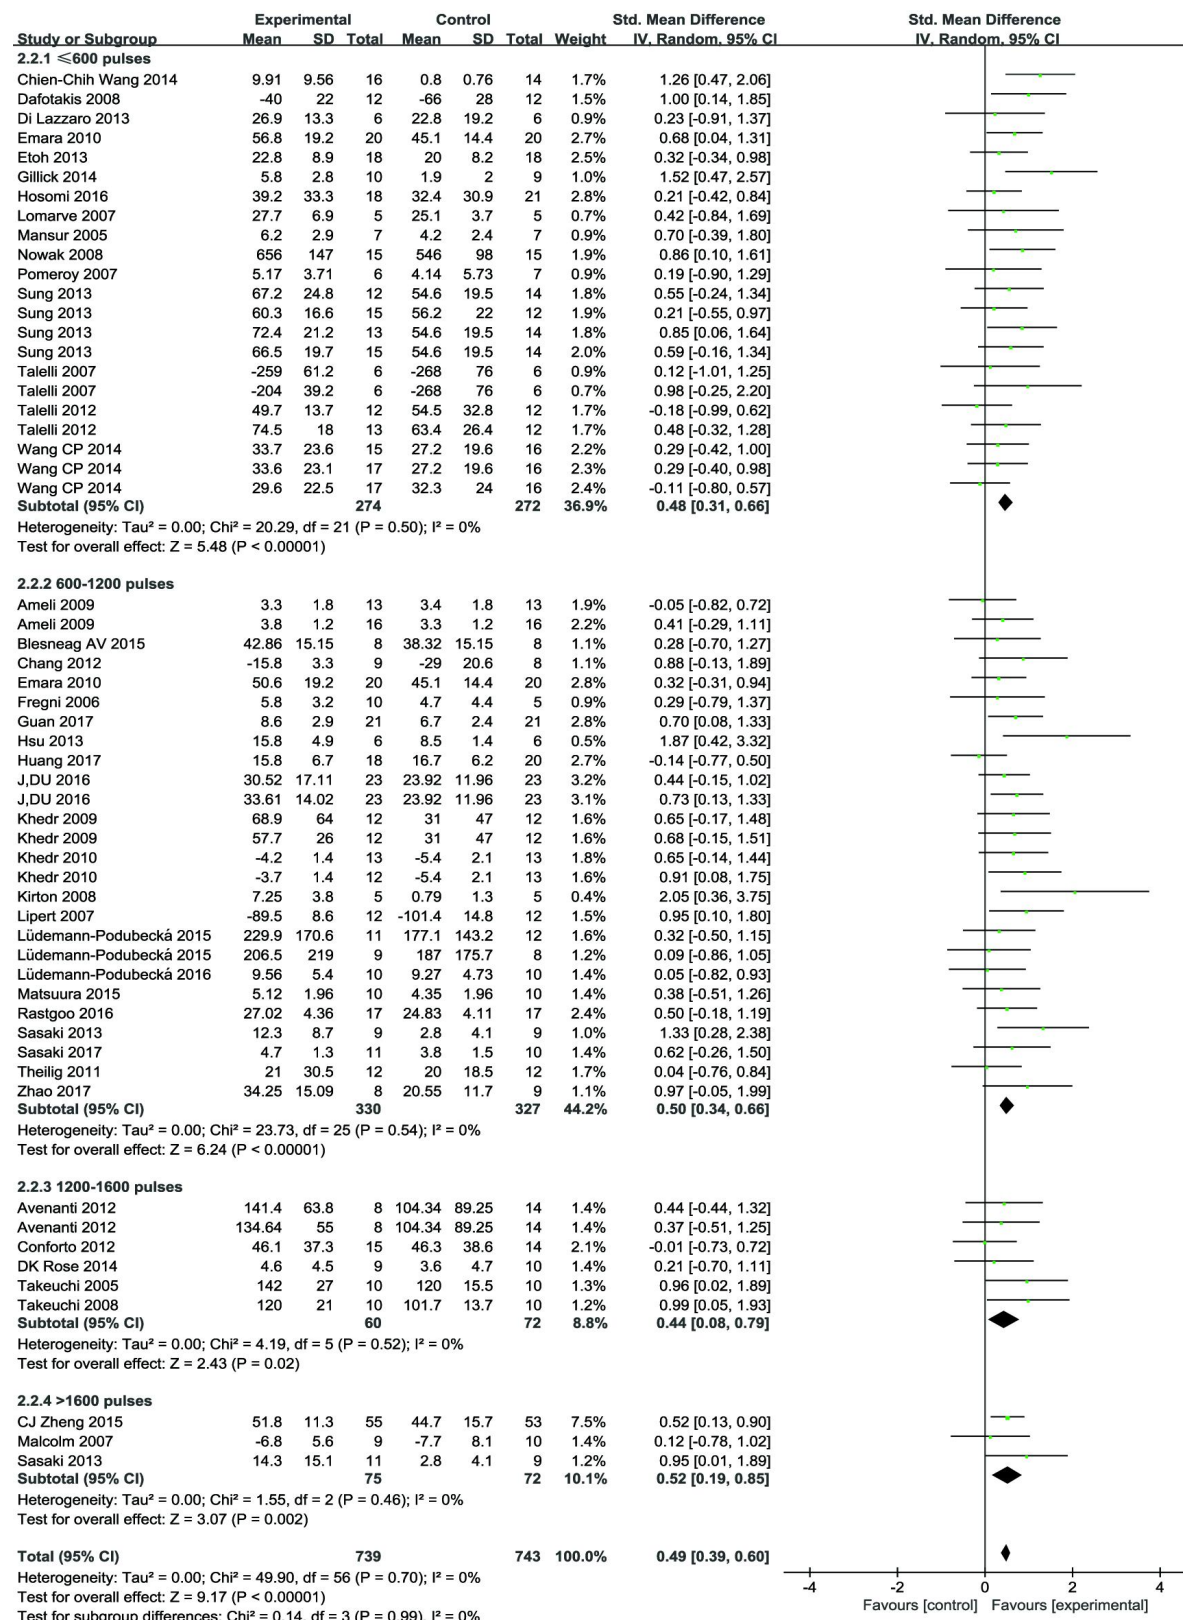

**Fig S4.** Forest plot from the meta-analysis of rTMS on limb motor function for studies comparing different stimulation pulses rTMS protocol showing estimates of effect size (SMD) with 95% confidence intervals. Relative weight for each trial is indicated by the size of the corresponding square.



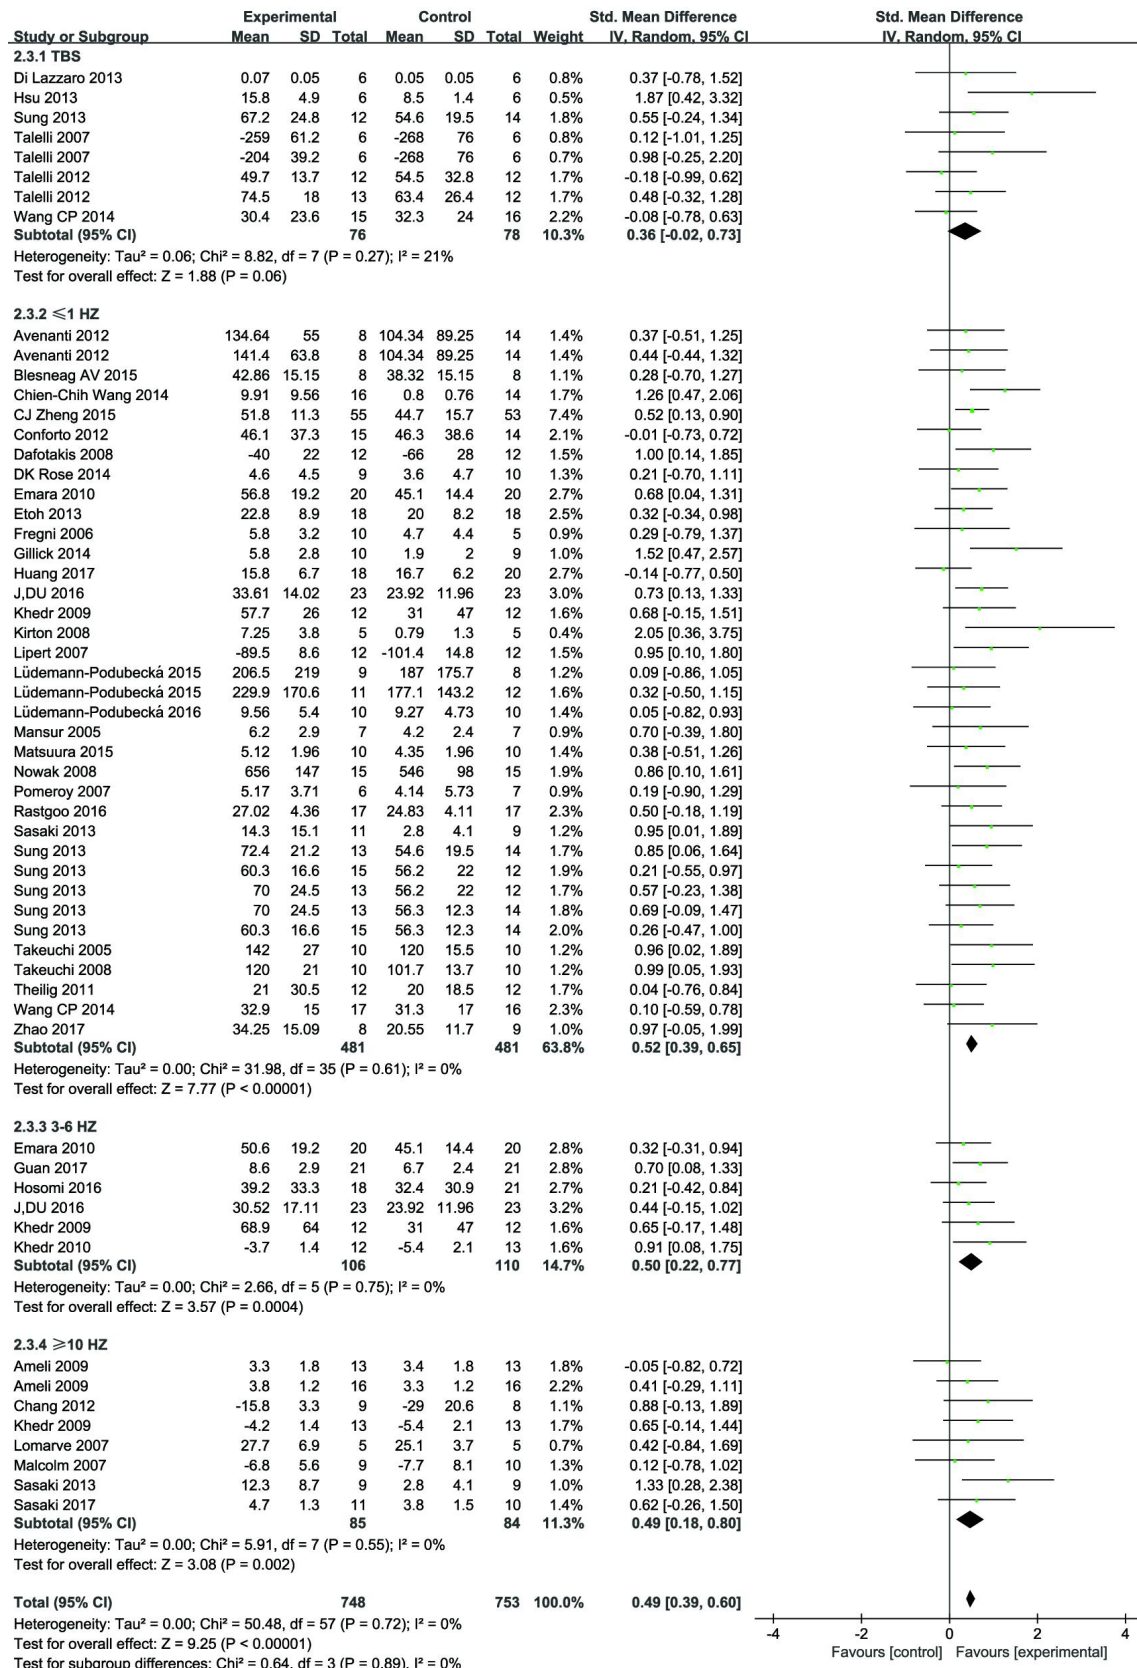

**Fig S5.** Forest plot from the meta-analysis of rTMS on limb motor function for studies comparing different stimulation frequency rTMS protocol showing estimates of effect size (SMD) with 95% confidence intervals. Relative weight for each trial is indicated by the size of the corresponding square.

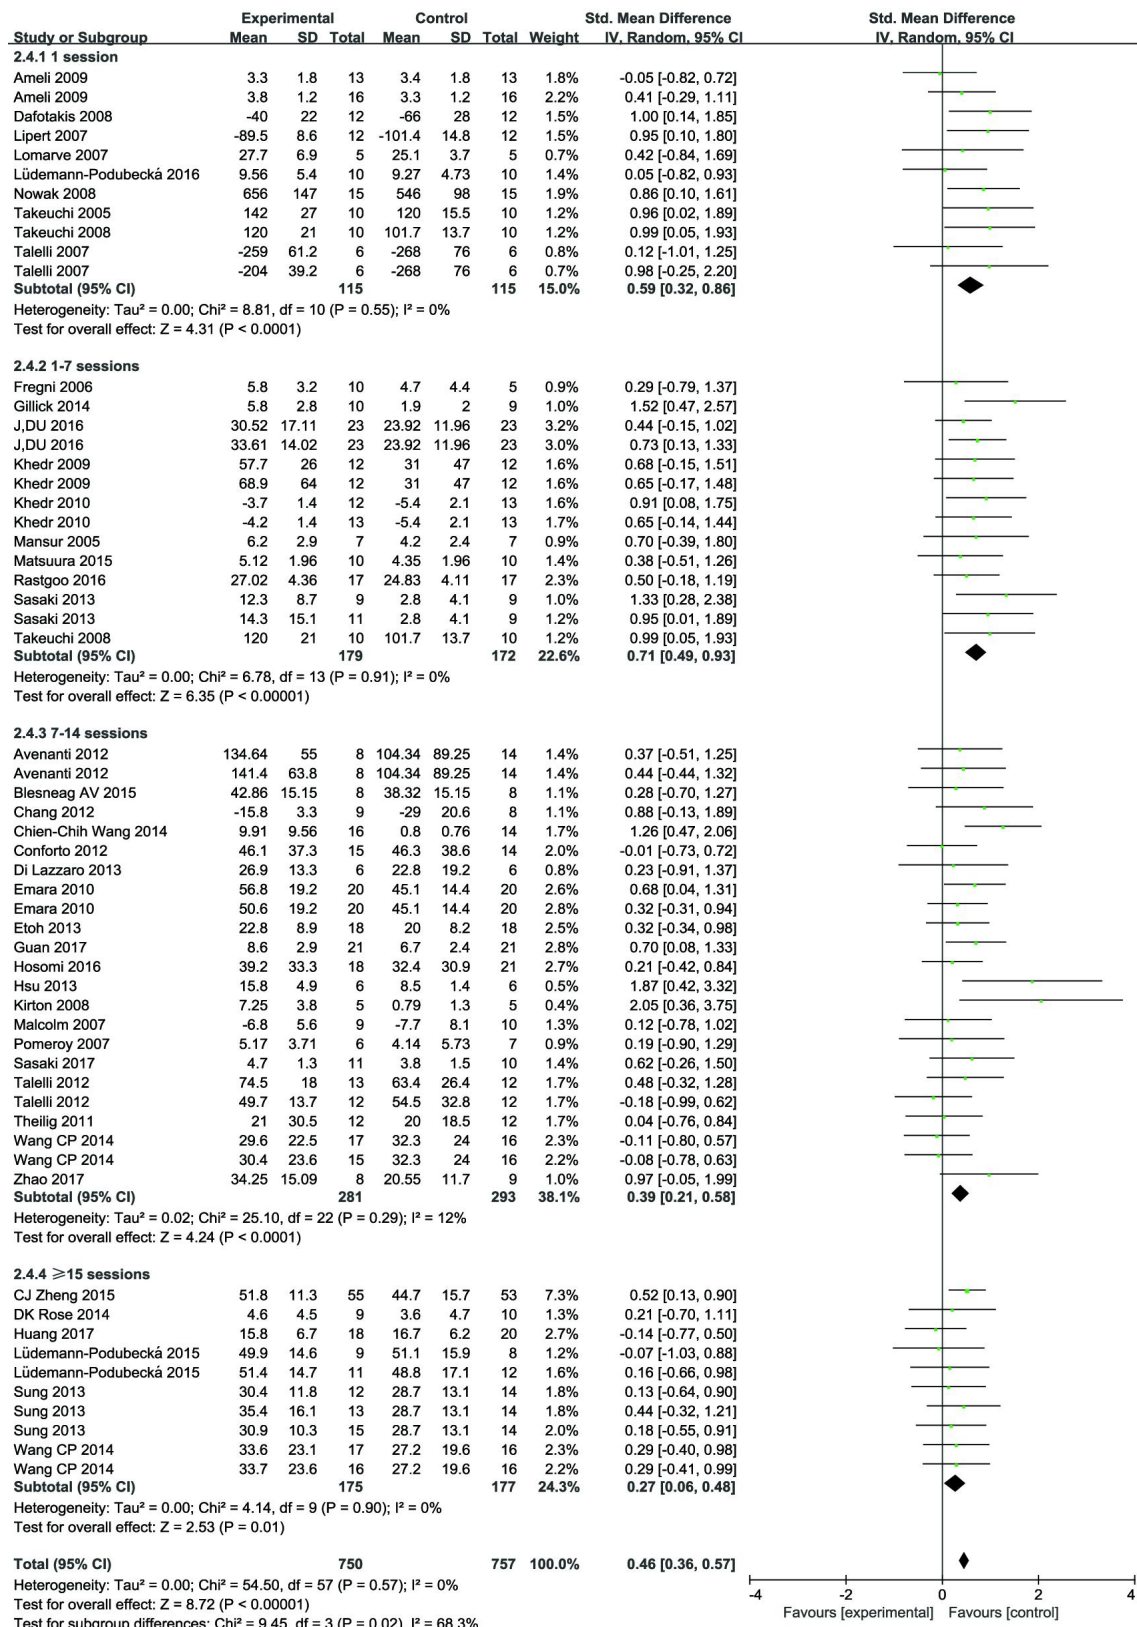

**Fig S6.** Forest plot from the meta-analysis of rTMS on limb motor function for studies comparing different stimulation sessions rTMS protocol showing estimates of effect size (SMD) with 95% confidence intervals. Relative weight for each trial is indicated by the size of the corresponding square.

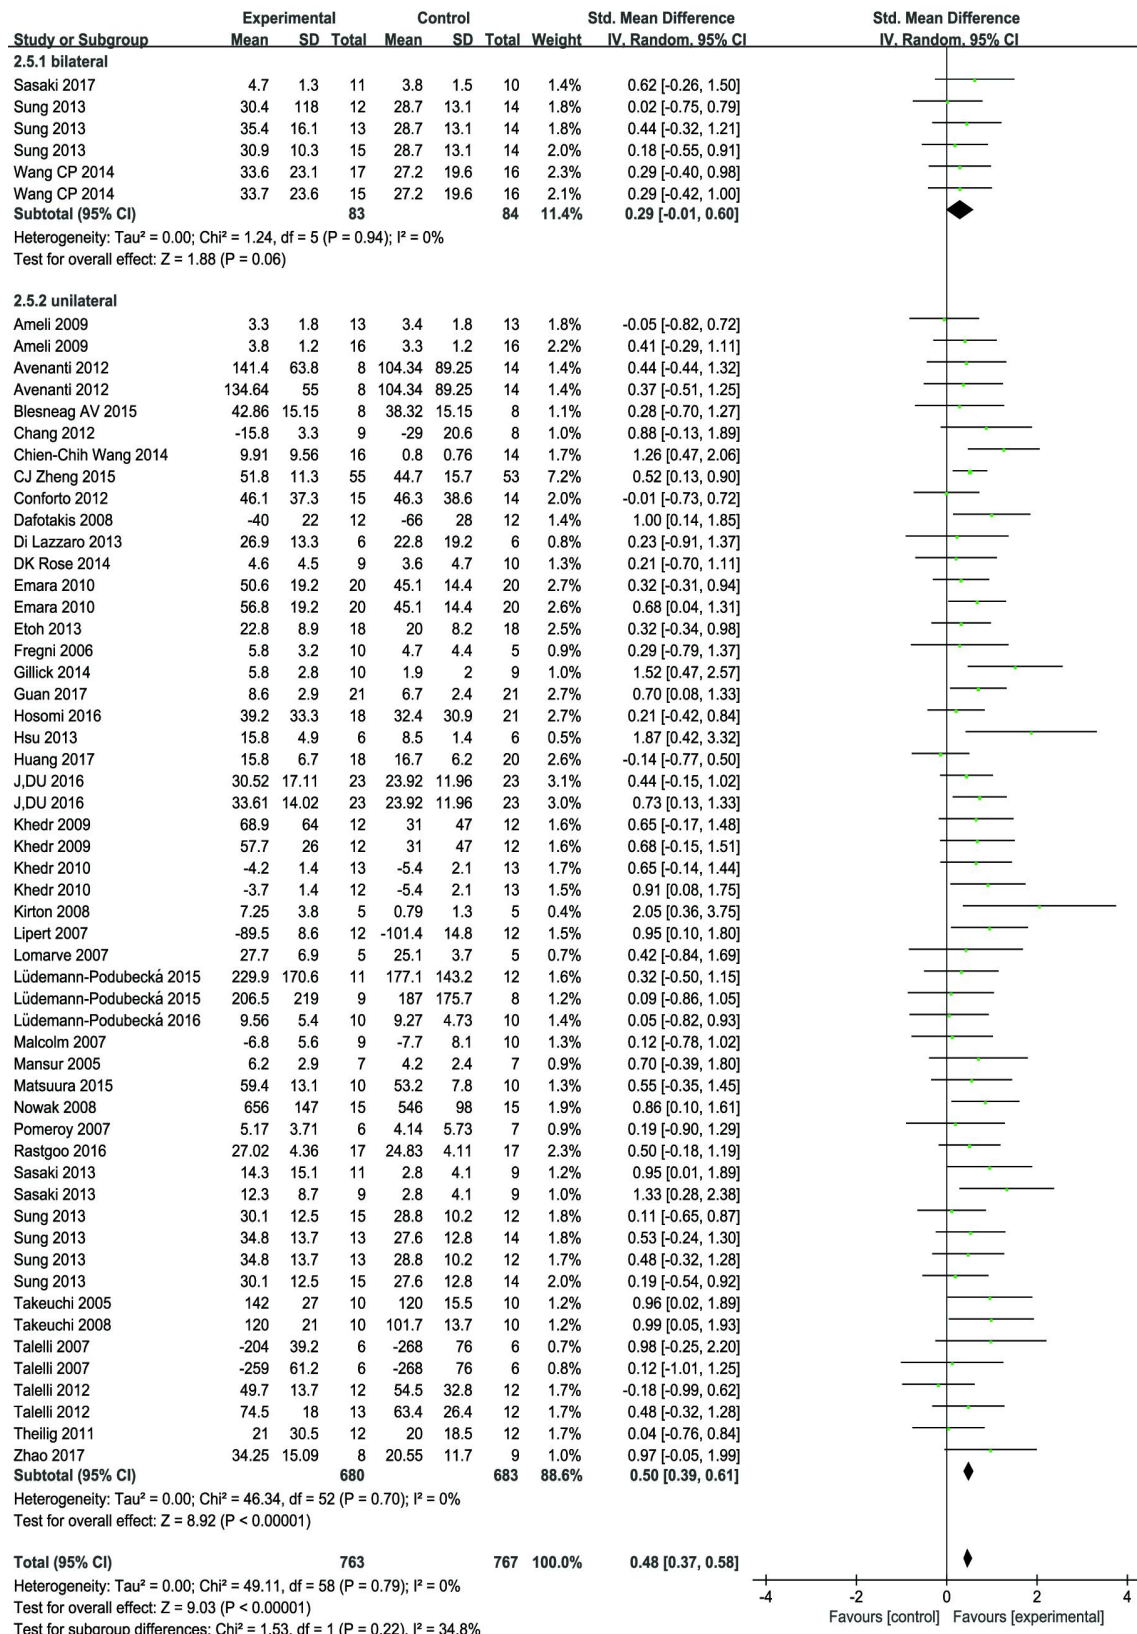

**Fig S7.** Forest plot from the meta-analysis of rTMS on limb motor function for studies comparing different stimulation sites rTMS protocol showing estimates of effect size (SMD) with 95% confidence intervals. Relative weight for each trial is indicated by the size of the corresponding square.



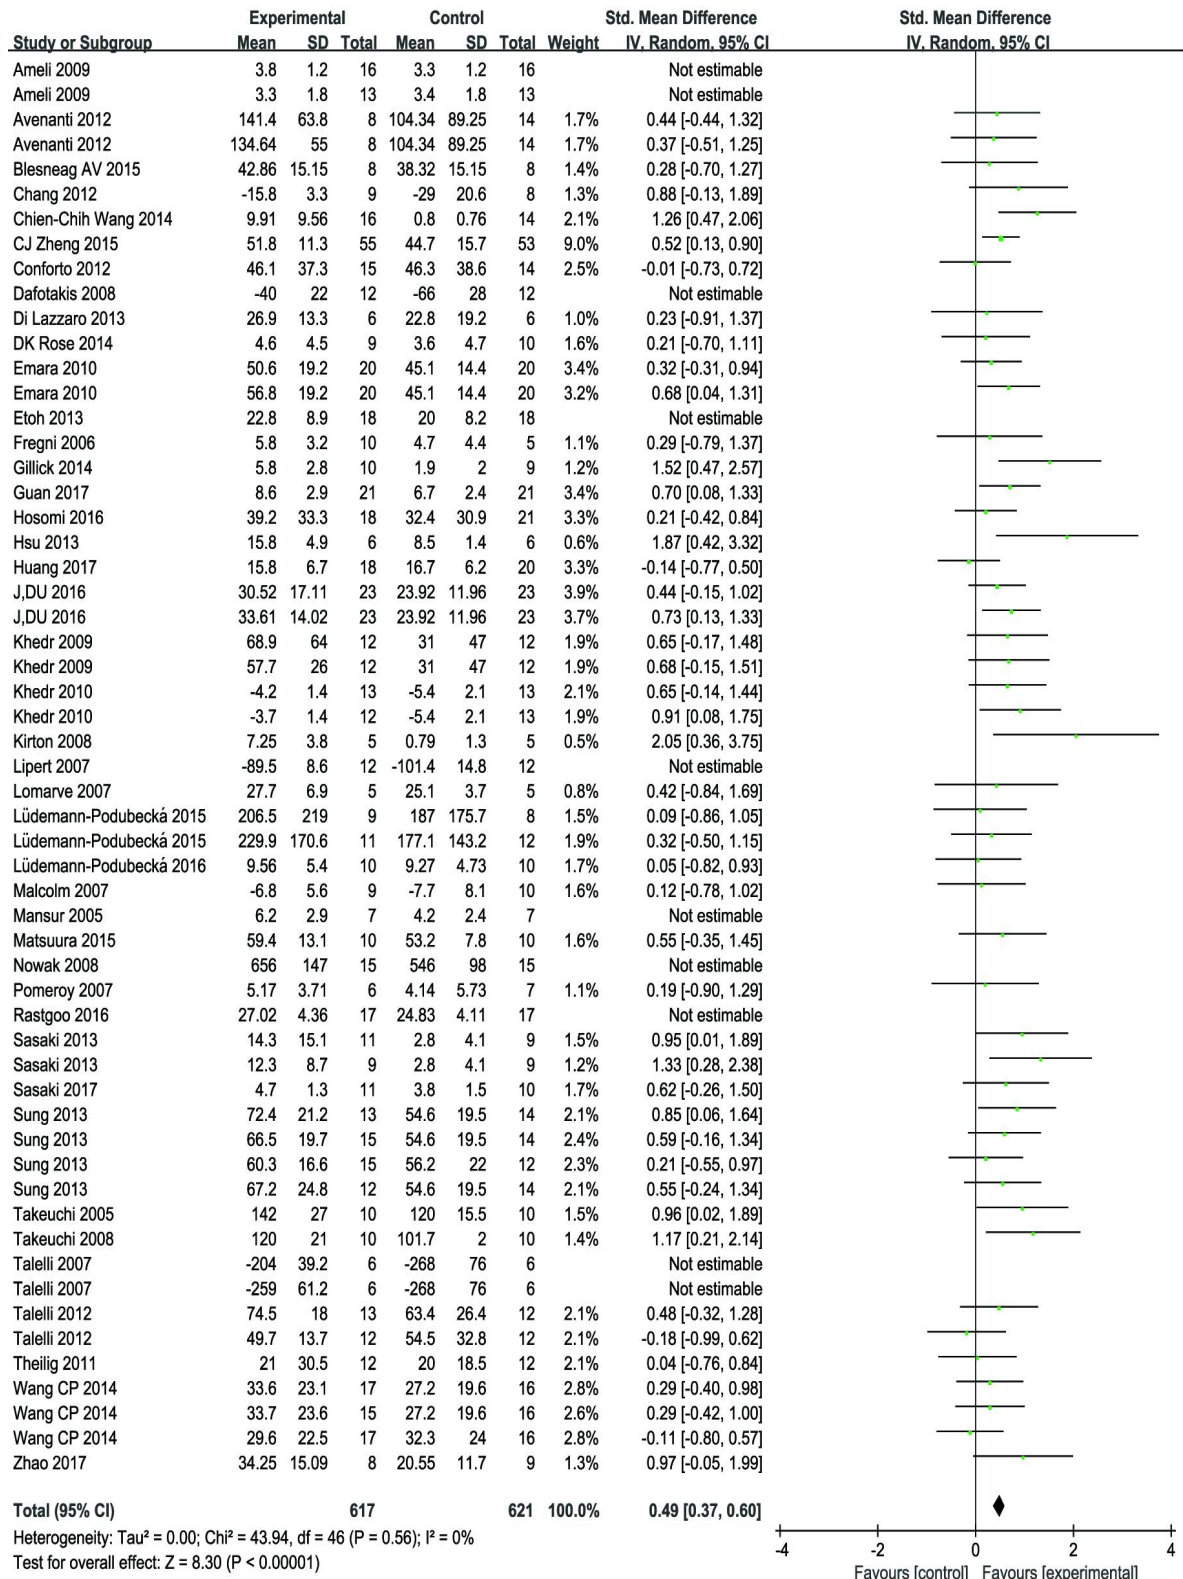

**Fig S8.** Forest plot from the meta-analysis of rTMS on limb motor function showing estimates of effect size (SMD) with 95% confidence intervals after the removal of the cross-over studies.

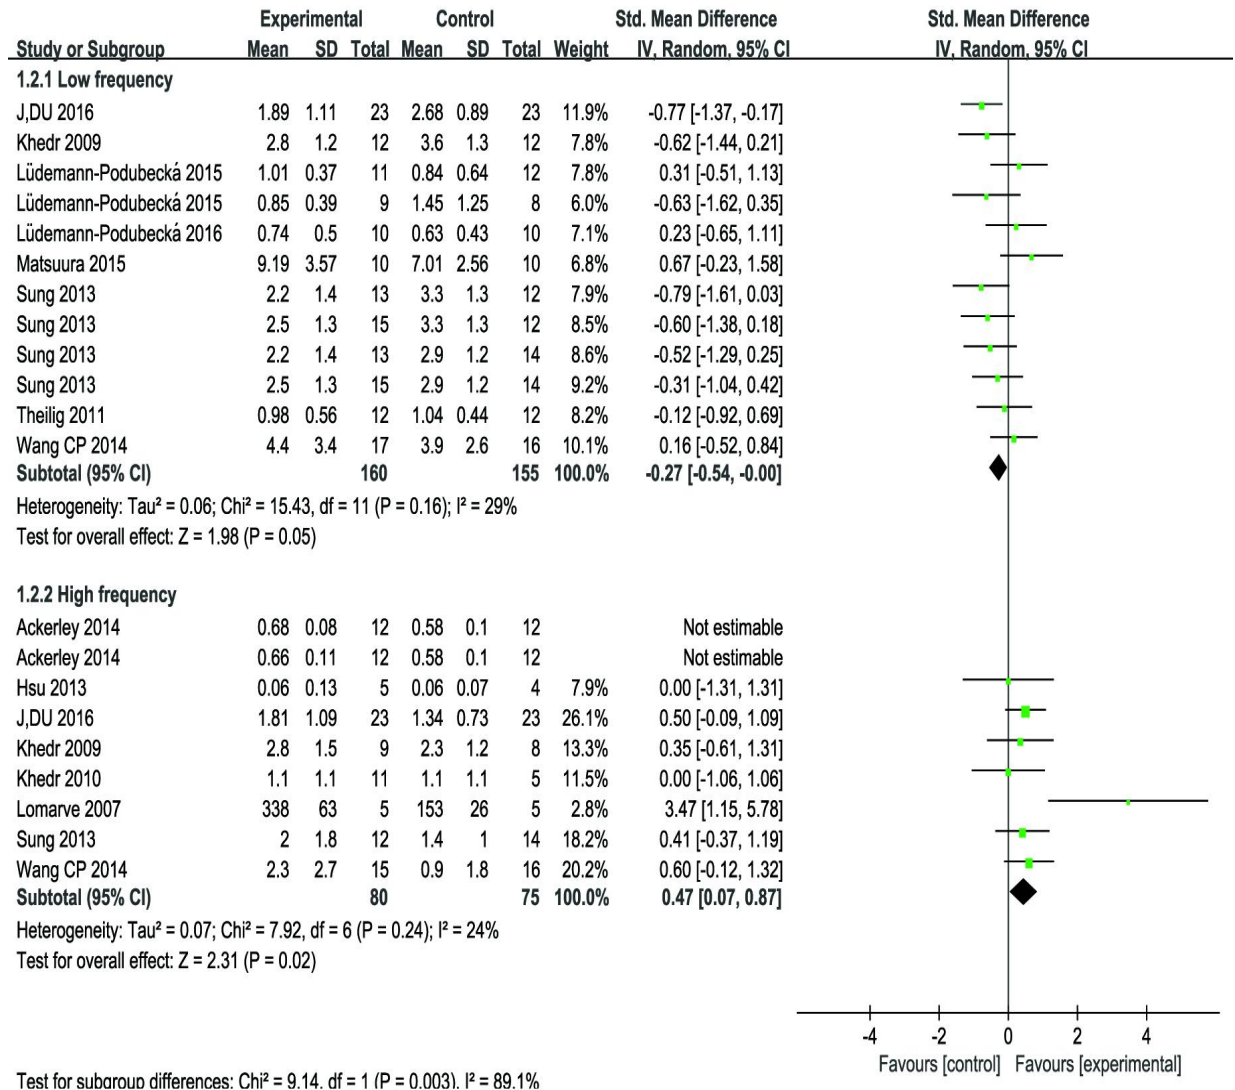

**Fig S9.** Forest plot from the meta-analysis of rTMS on motor evoked potentials showing estimates of effect size (SMD) with 95% confidence intervals after the removal of the cross-over study.

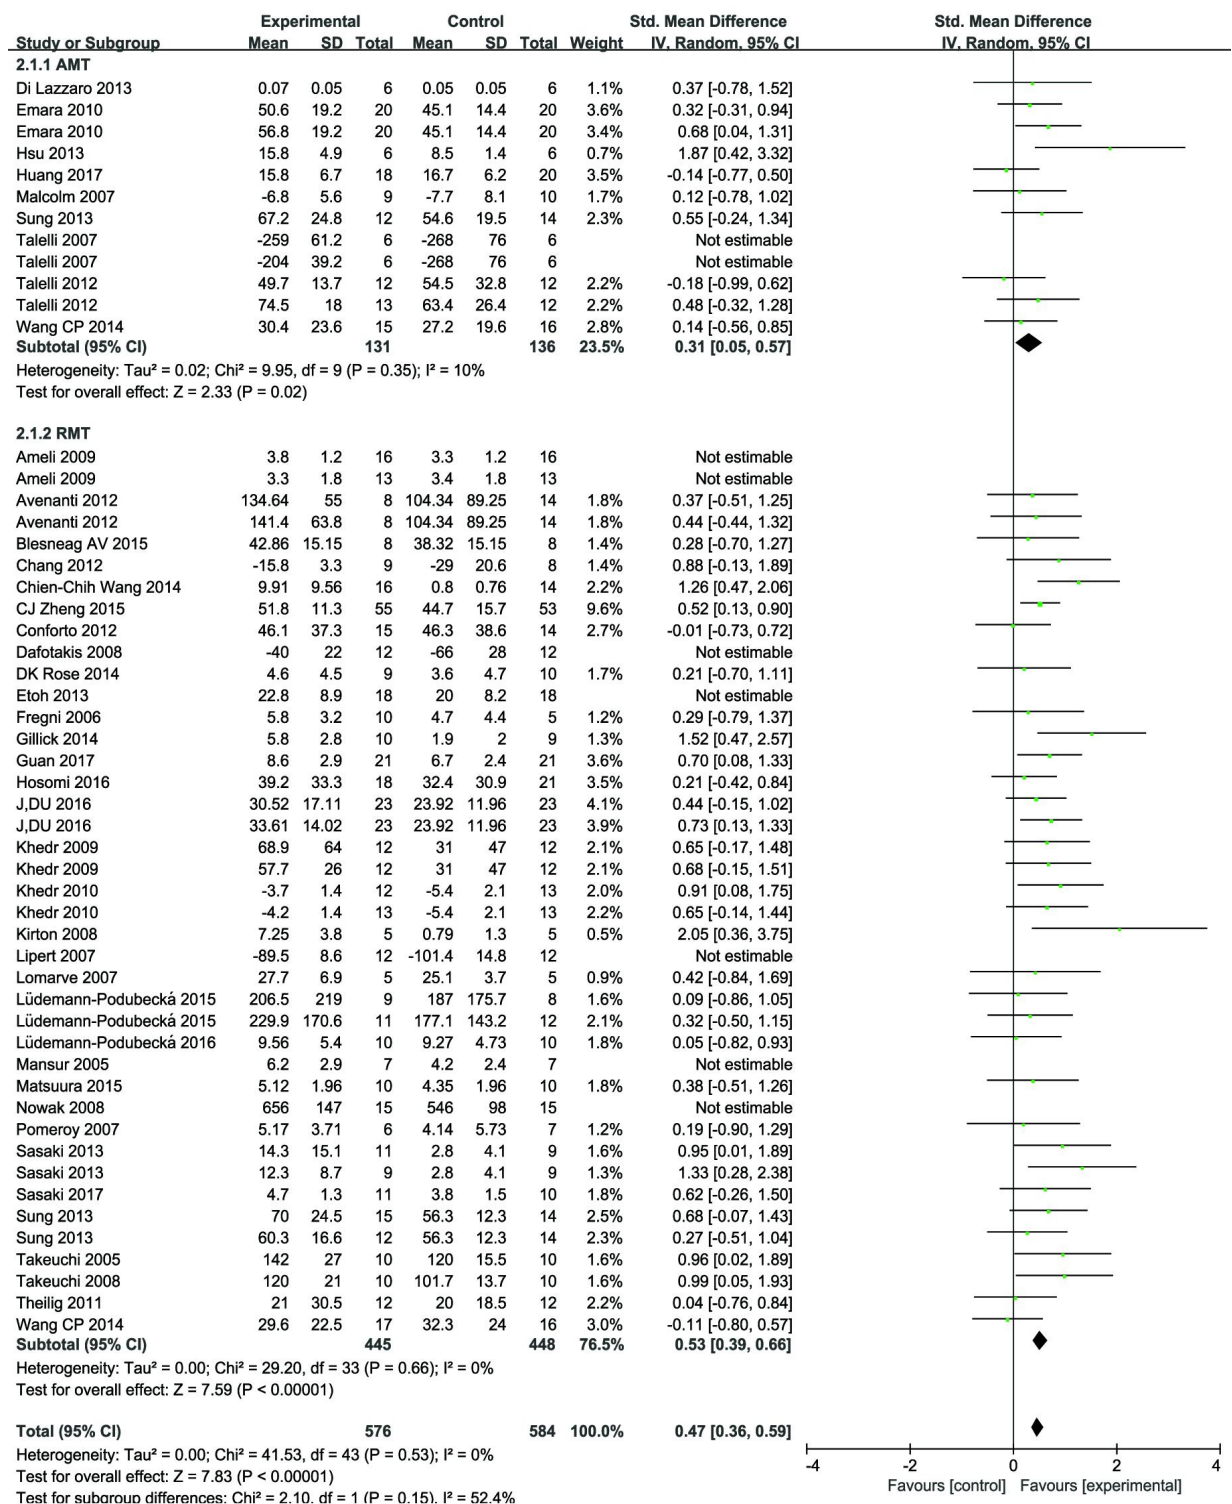

**Fig S10.** Forest plot from the meta-analysis of rTMS on limb motor function for studies comparing active motor threshold and resting motor threshold rTMS protocol showing estimates of effect size (SMD) with 95% confidence intervals after the removal of the cross-over studies.

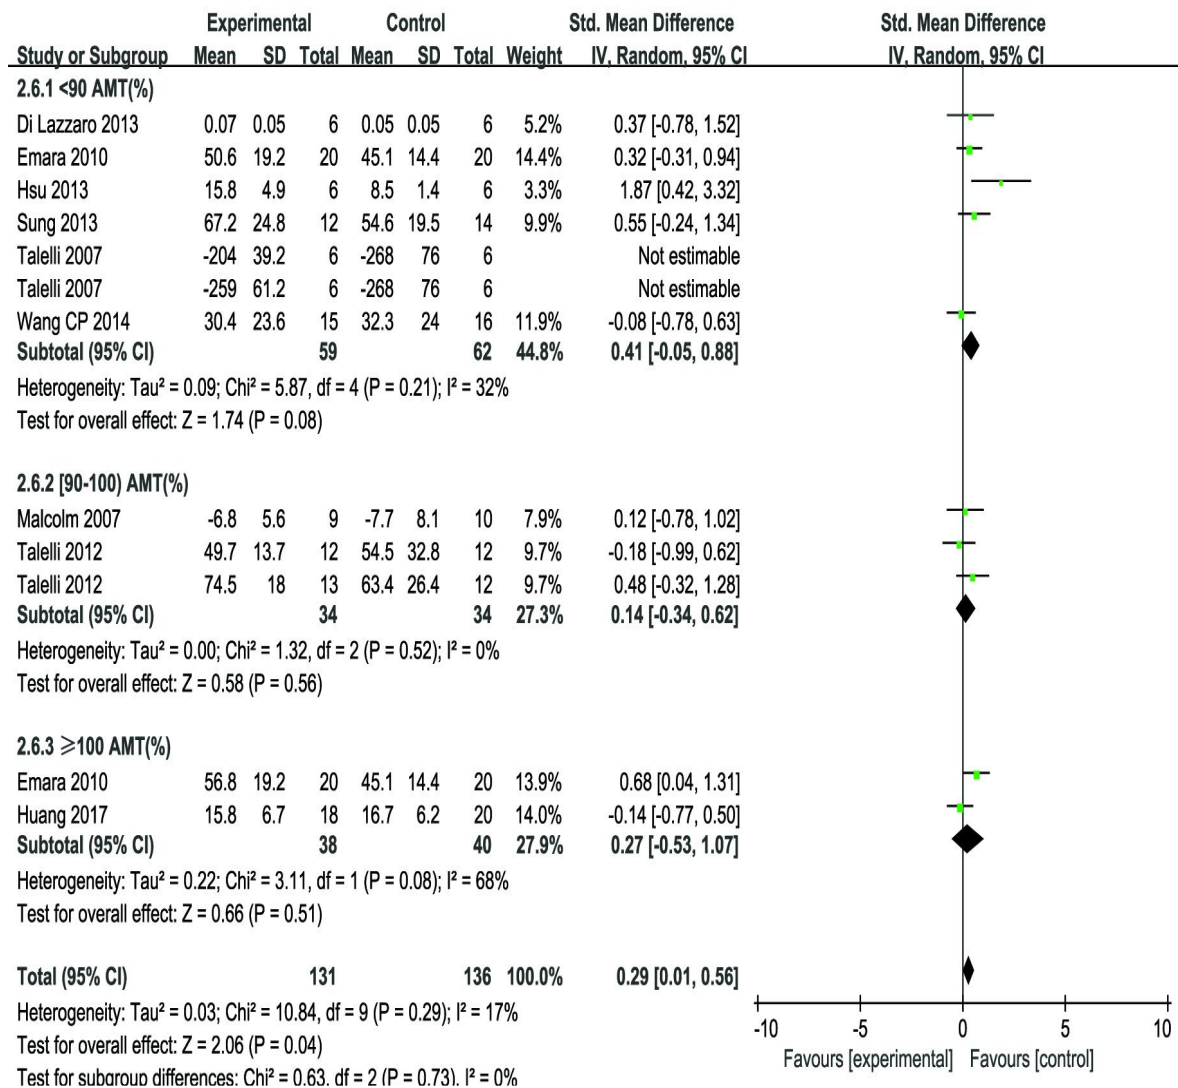

**Fig S11.** Forest plot from the meta-analysis of rTMS on limb motor function for studies comparing different active motor threshold (AMT)rTMS protocol showing estimates of effect size (SMD) with 95% confidence intervals after the removal of the cross-over studies.



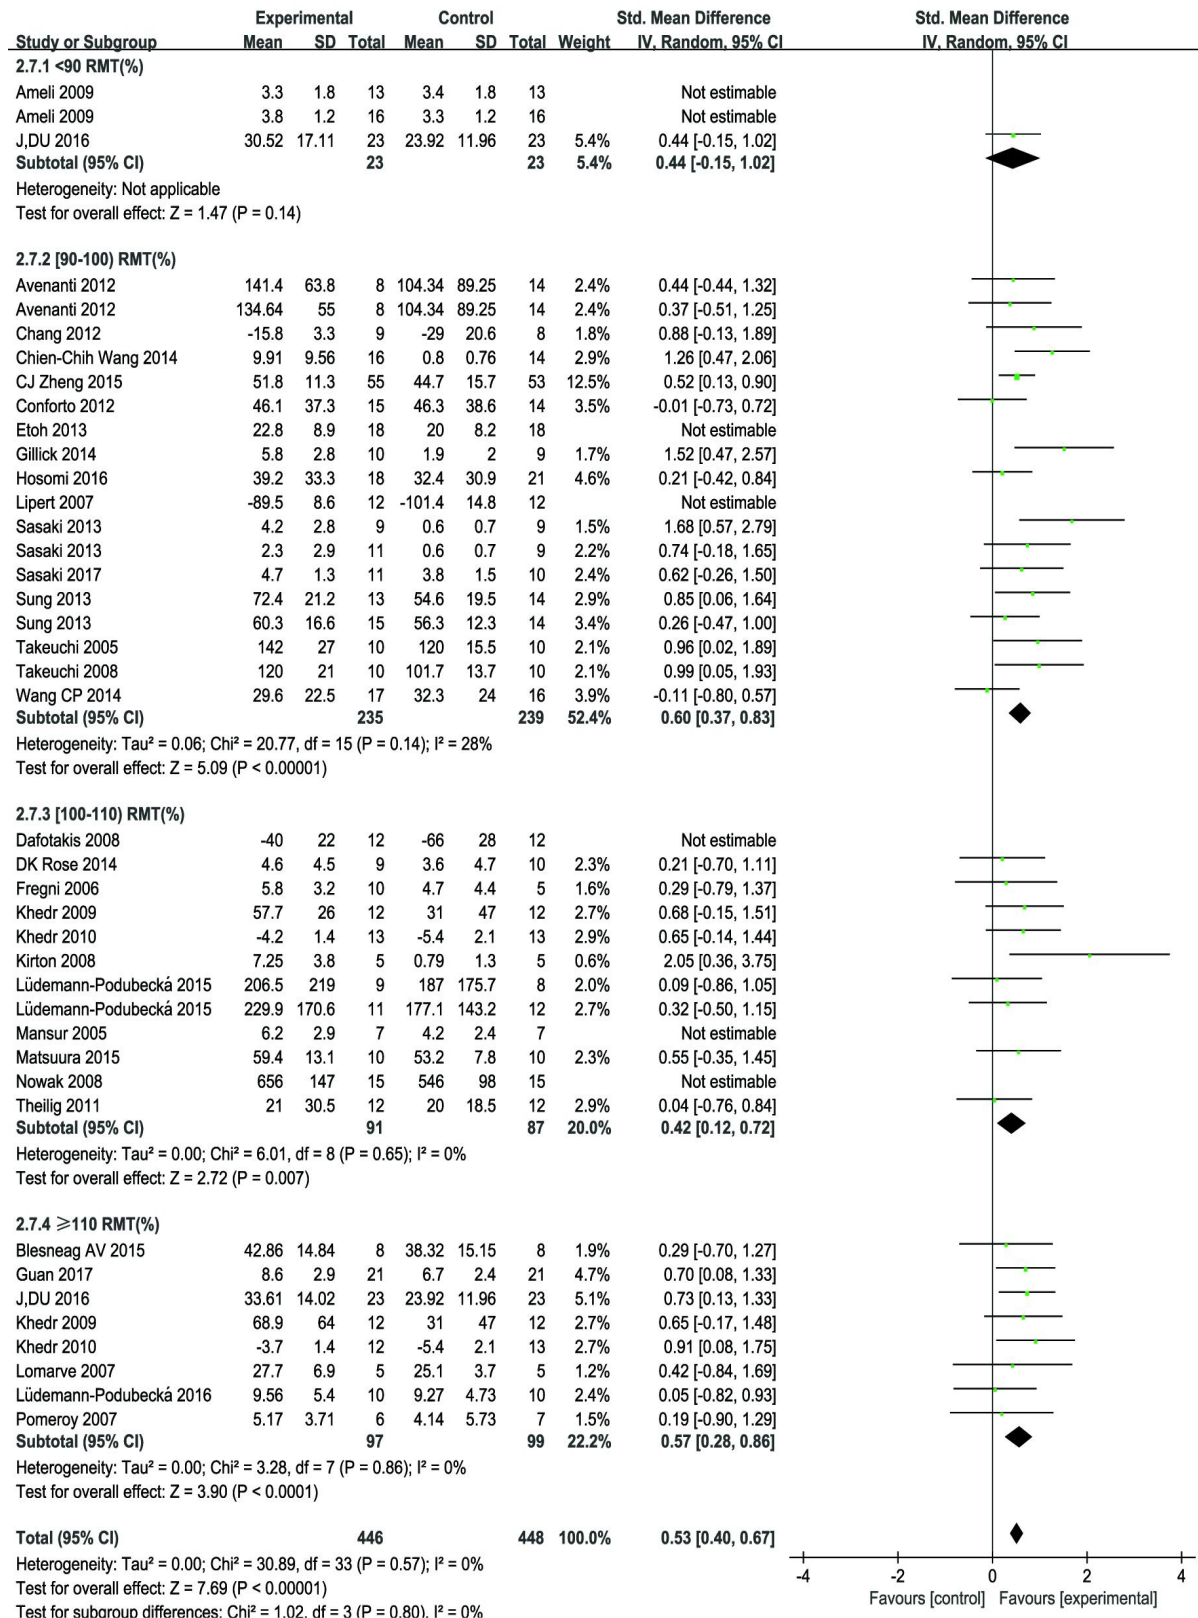

**Fig S12.** Forest plot from the meta-analysis of rTMS on limb motor function for studies comparing different resting motor threshold (RMT)rTMS protocol showing estimates of effect size (SMD) with 95% confidence intervals after the removal of the cross-over studies.

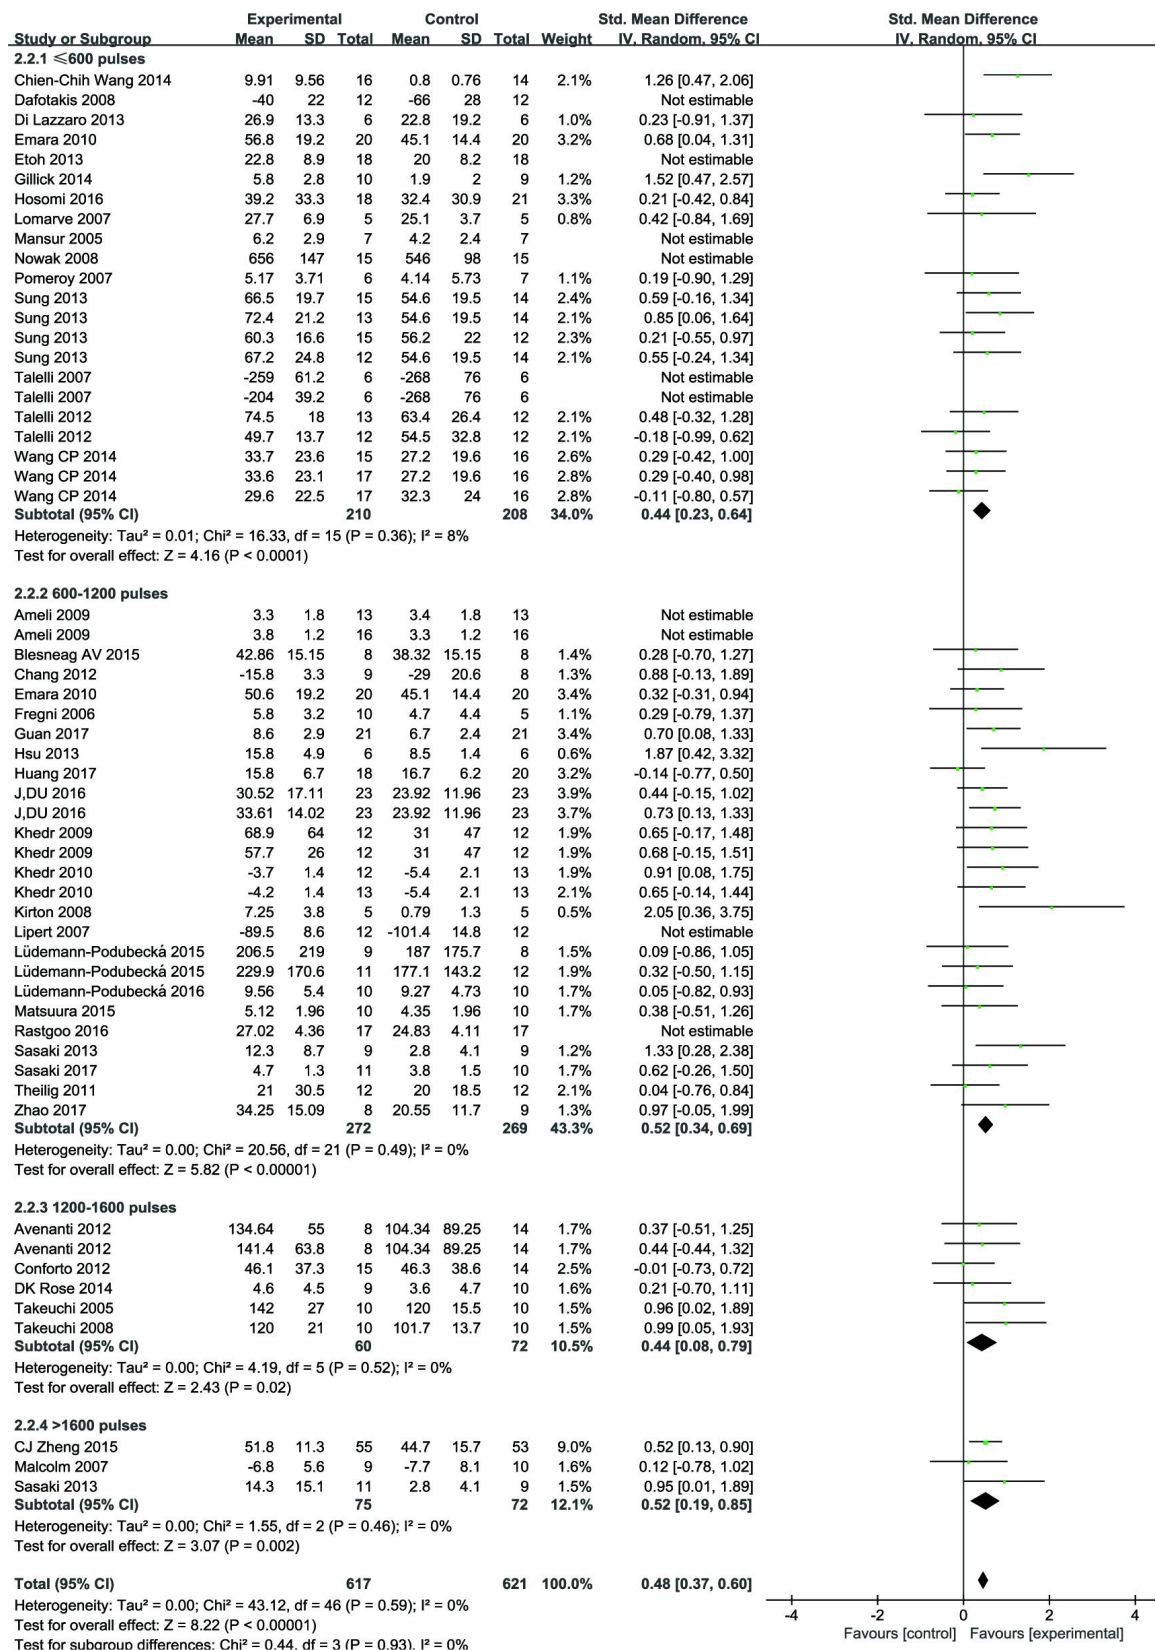

**Fig S13.** Forest plot from the meta-analysis of rTMS on limb motor function for studies comparing different stimulation pulses rTMS protocol showing estimates of effect size (SMD) with 95% confidence intervals after the removal of the cross-over studies.

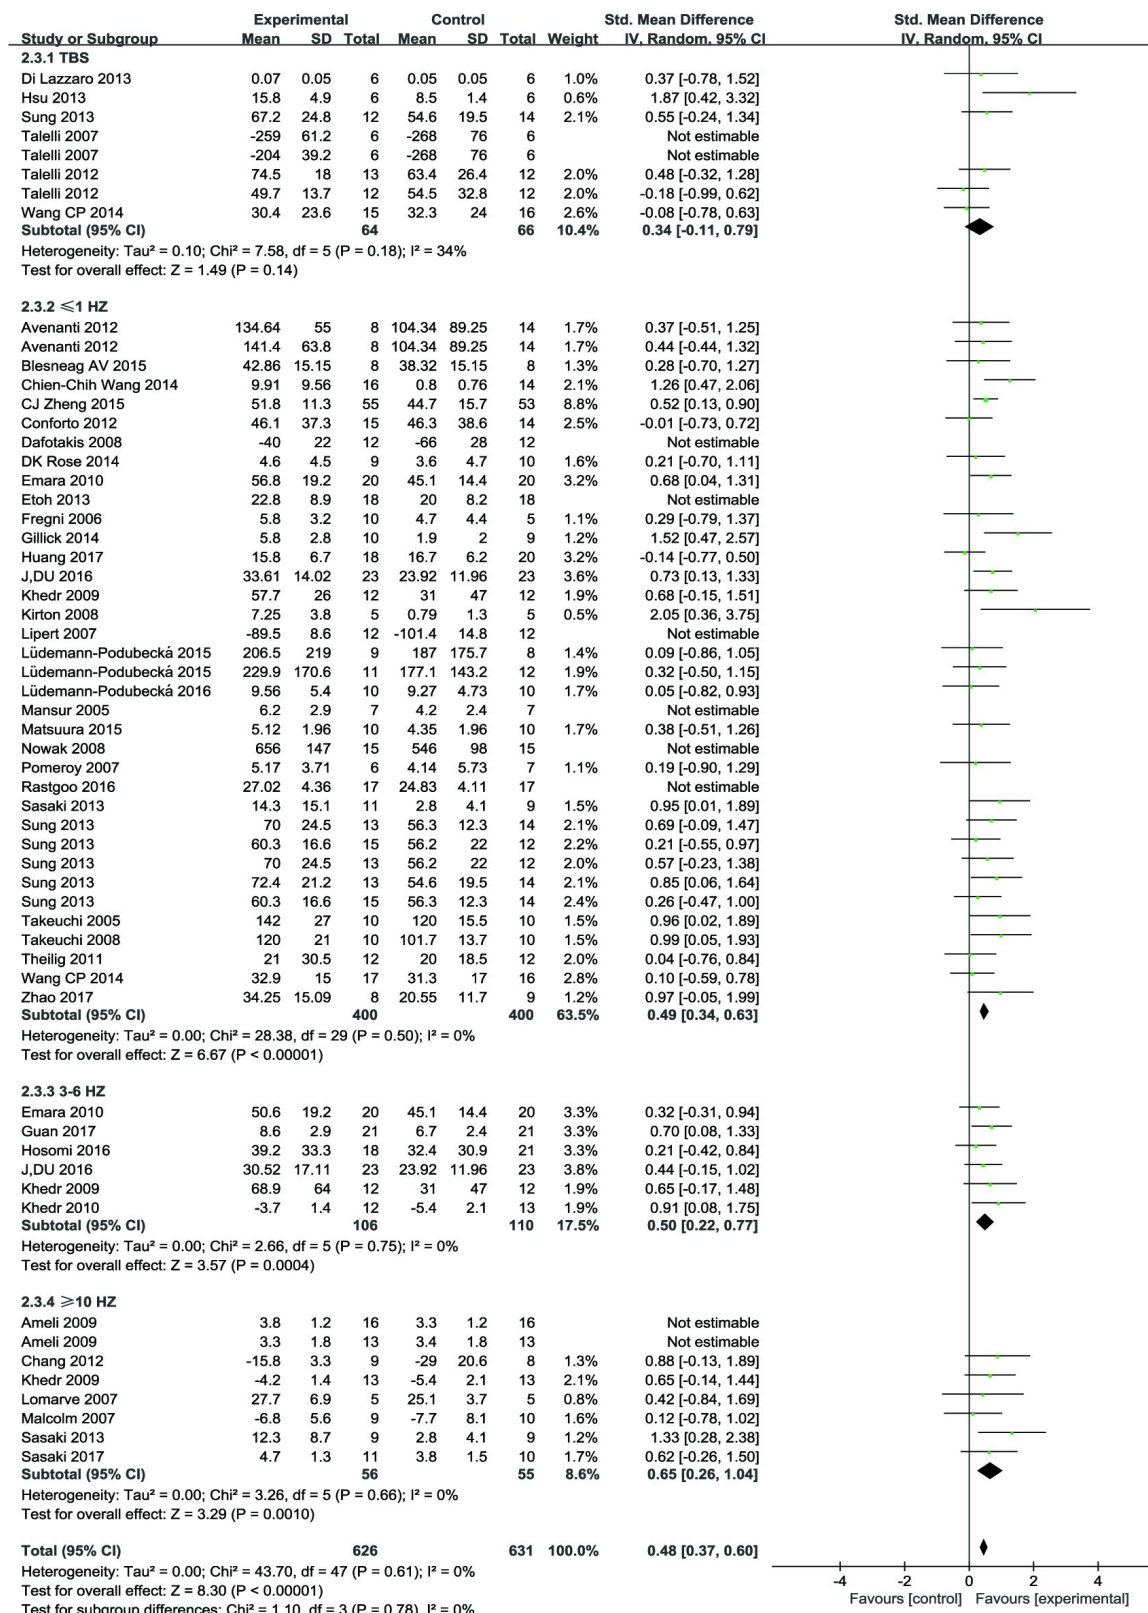

**Fig S14.** Forest plot from the meta-analysis of rTMS on limb motor function for studies comparing different stimulation frequency rTMS protocol showing estimates of effect size (SMD) with 95% confidence intervals after the removal of the cross-over studies.



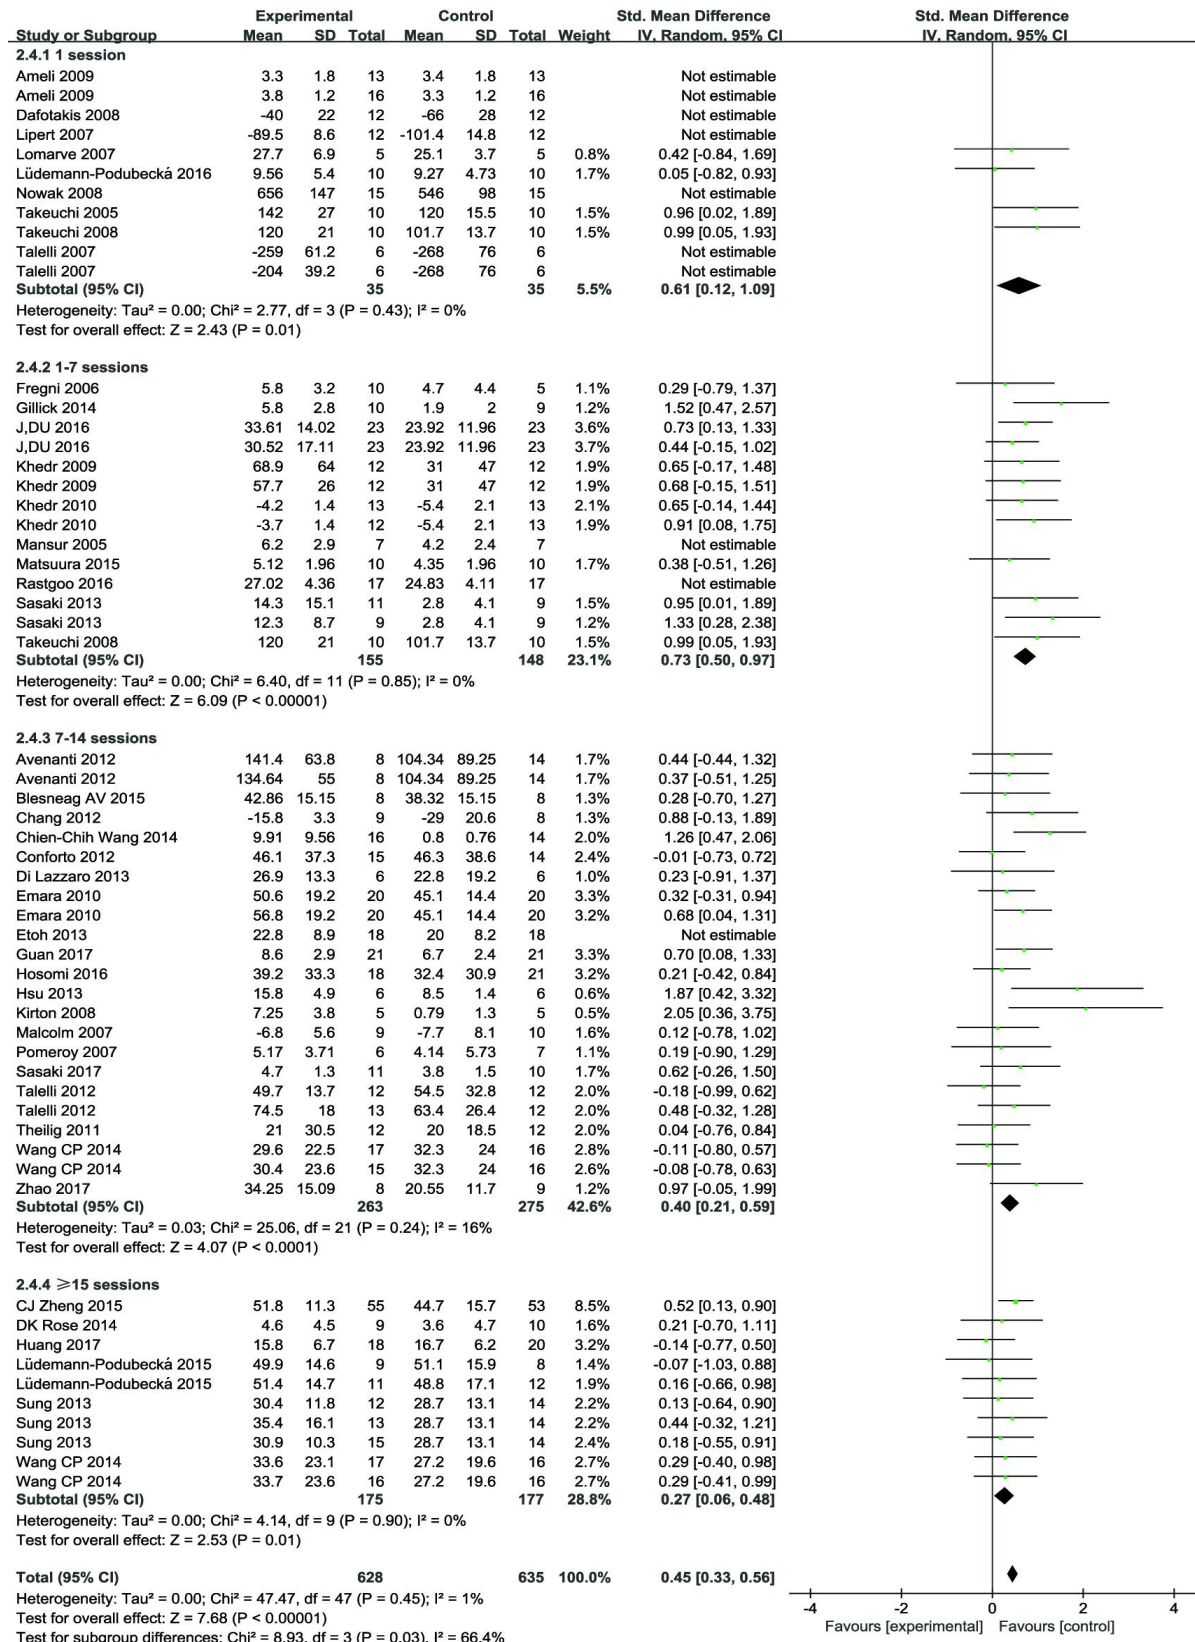

**Fig S15.** Forest plot from the meta-analysis of rTMS on limb motor function for studies comparing different stimulation sessions rTMS protocol showing estimates of effect size (SMD) with 95% confidence intervals after the removal of the cross-over studies.



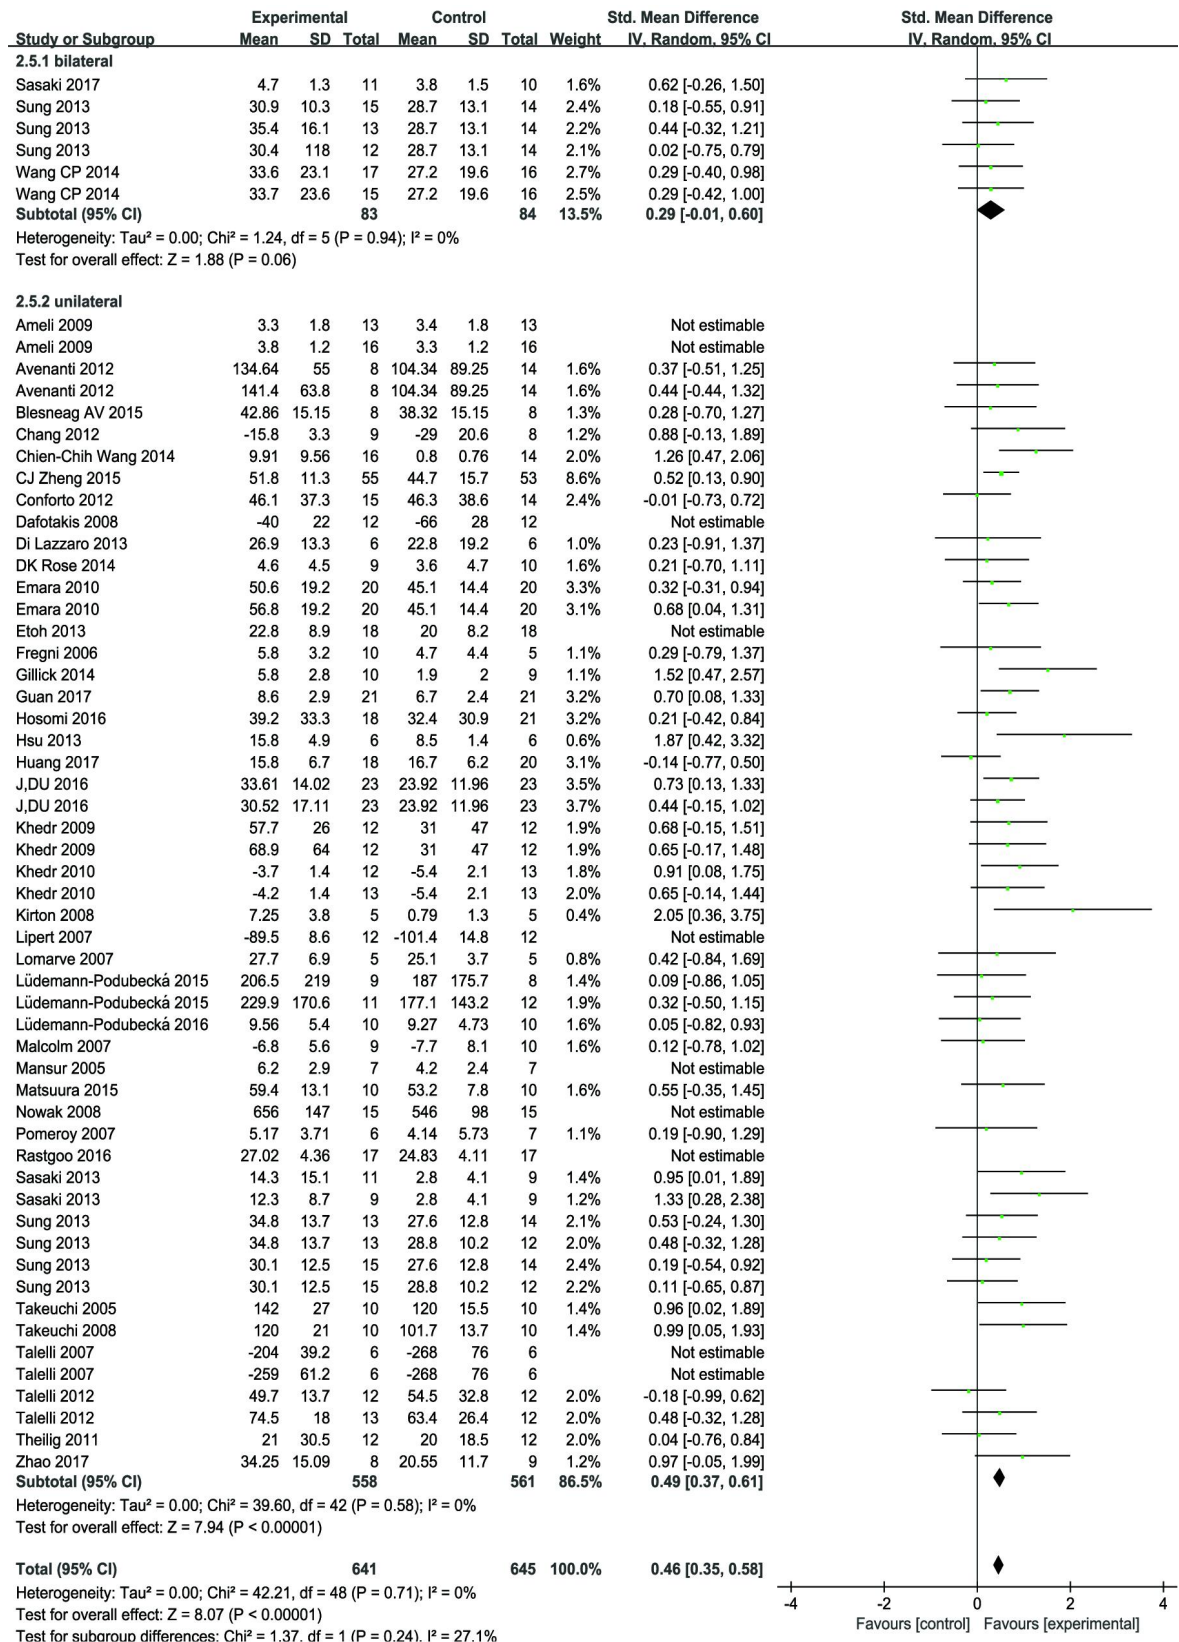

**Fig S16.** Forest plot from the meta-analysis of rTMS on limb motor function for studies comparing different stimulation sites rTMS protocol showing estimates of effect size (SMD) with 95% confidence intervals after the removal of the cross-over studies.

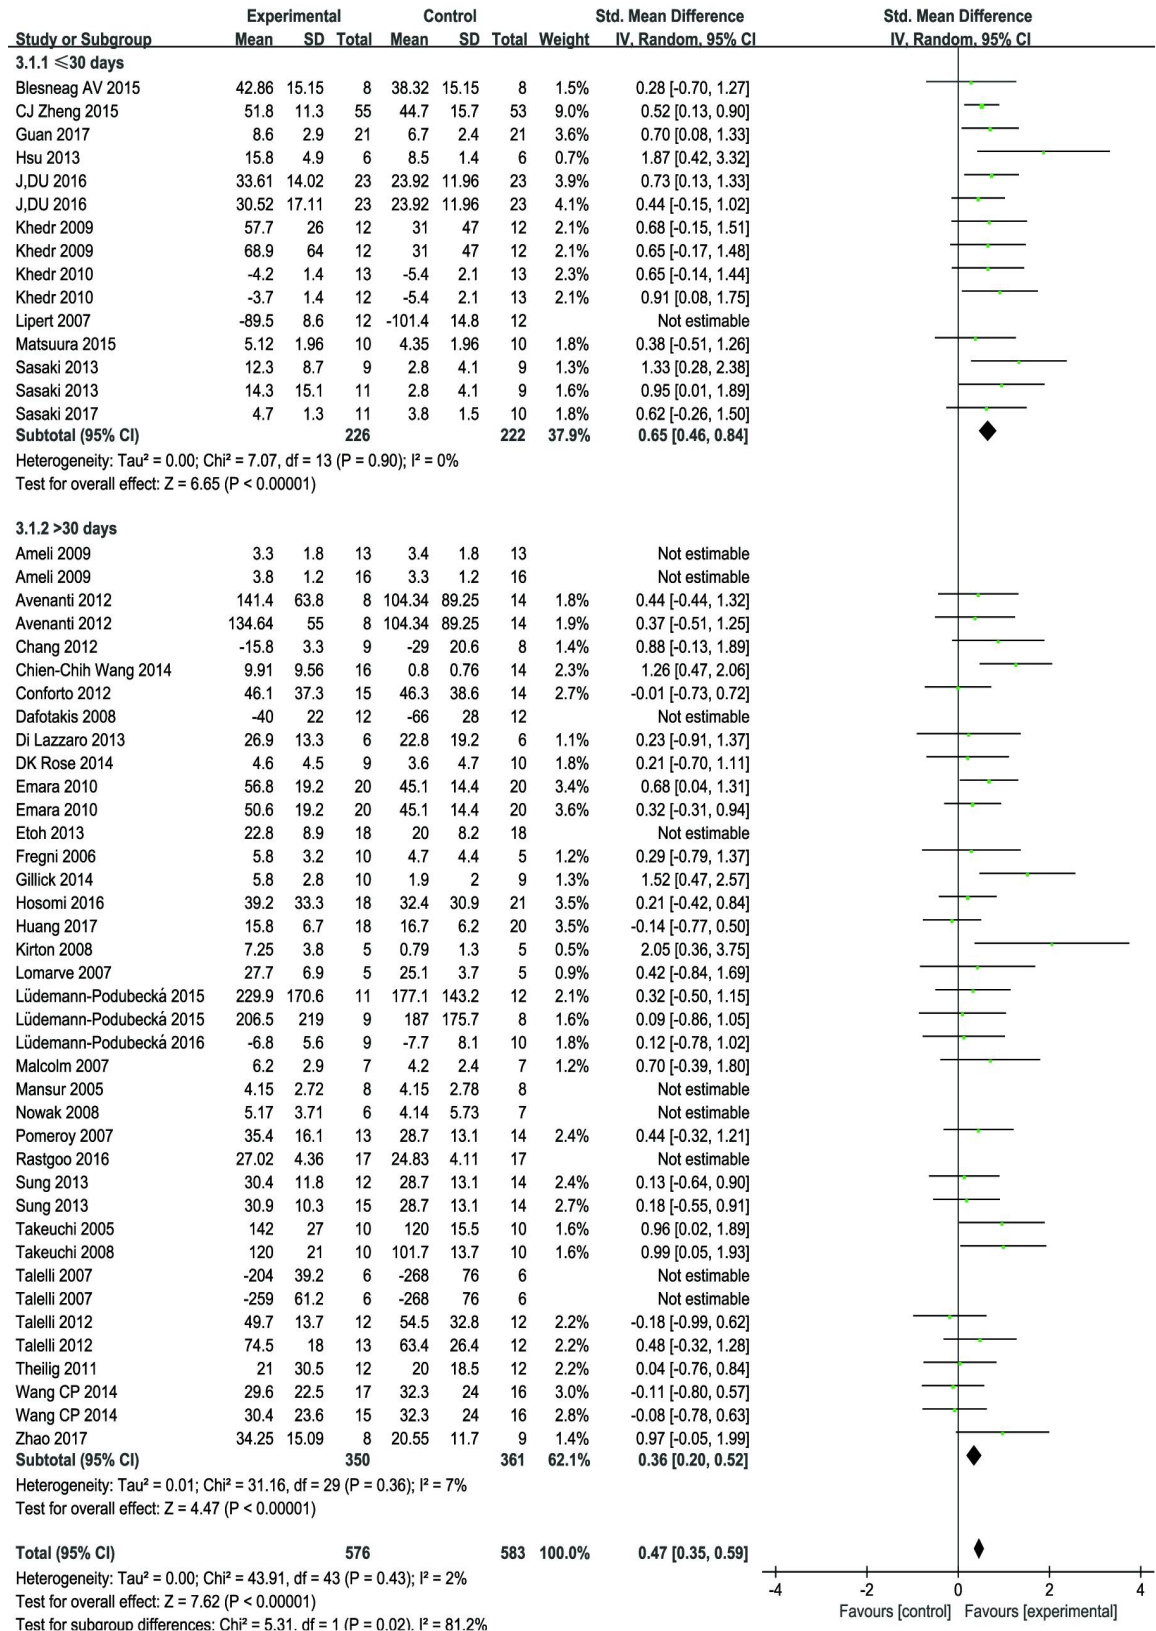

**Fig S17.** Forest plot from the meta-analysis of rTMS on limb motor function for studies comparing early stroke(within 30 days) and chronic stroke(>30 days) showing estimates of effect size (SMD) with 95% confidence intervals after the removal of the cross-over studies.

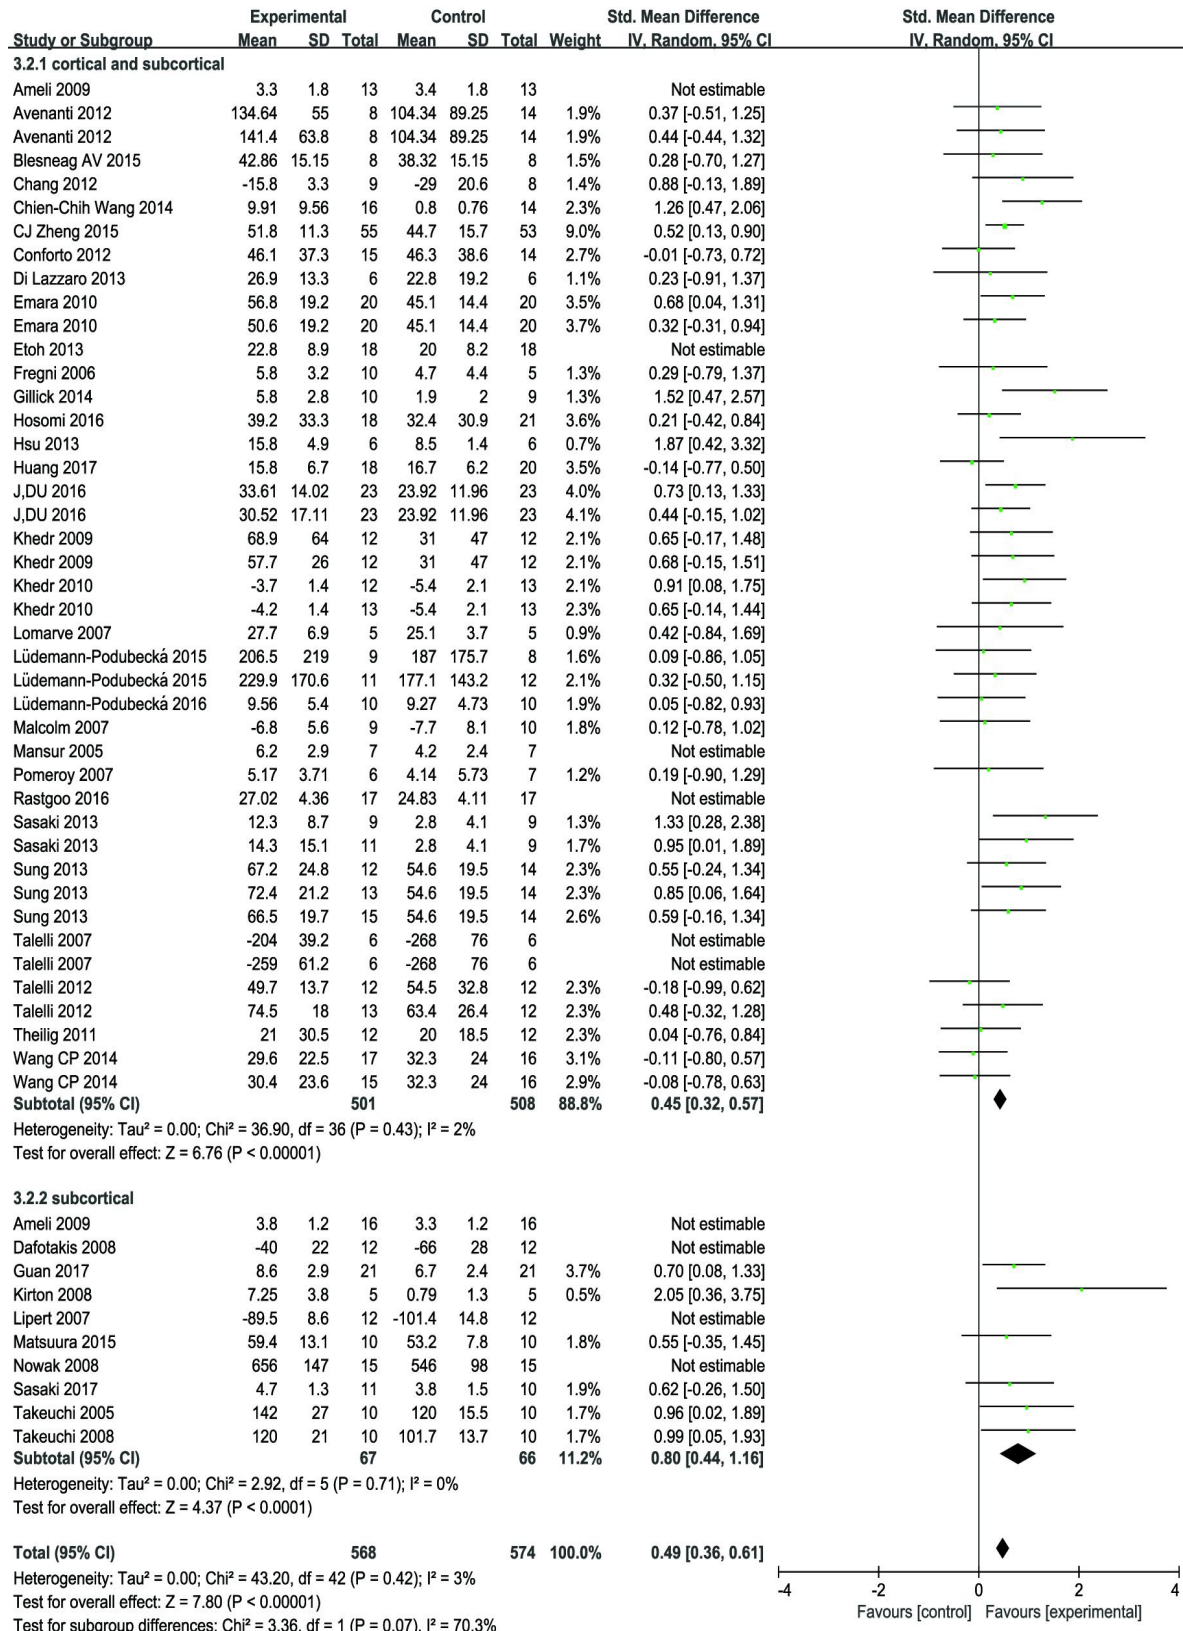

**Fig S18.** Forest plot from the meta-analysis of rTMS on limb motor function for studies comparing pure subcortical stroke and including cortical stroke showing estimates of effect size (SMD) with 95% confidence intervals after the removal of the cross-over studies.
